# Supplementary material for: Origin and stabilization of axial chirality in the construction of naphthyl-C2-indoles: a DFT study
Source: Royal Society of Chemistry journal article supplement (doi:10.1039/d0qo00936a), 2020-01-01
Supplement: d0qo00936a1.pdf [file d0qo00936a1.pdf]

## *Supporting Information for*

### **Origin and Stabilization of Axial Chirality on the Construction of Naphthyl-C2-Indoles: A DFT Study**

Qianqian Deng,<sup>a</sup> Yang Wang,<sup>b</sup> Shi-Jun Li,<sup>\*a</sup> Ling-Bo Qu,<sup>a</sup> Yu Lan<sup>a</sup> and Donghui Wei<sup>\*a</sup>

<sup>a</sup> College of Chemistry, and Institute of Green Catalysis, Zhengzhou University, 100 Science Avenue, Zhengzhou 450001, Henan, P. R. China. E-mail: [lishijunzong@zzu.edu.cn](mailto:lishijunzong@zzu.edu.cn), [donghuiwei@zzu.edu.cn](mailto:donghuiwei@zzu.edu.cn).

<sup>b</sup> Department of Material and Chemical Engineering, Zhengzhou University of Light Industry, 136 Science Avenue, Zhengzhou 450002, Henan Province, P.R. China

#### **Table of Contents**

|    |                                                         |   |
|----|---------------------------------------------------------|---|
| 1. | Test results of computational methods.....              | 1 |
| 2. | NCI and topology analyses of <b>TS1S</b> .....          | 1 |
| 3. | The structures of intermediates.....                    | 2 |
| 4. | The volume of R.....                                    | 3 |
| 5. | Energies of optimized structures.....                   | 3 |
| 6. | Cartesian coordinates of all the stationary points..... | 4 |

## 1. Test results of computational methods

M062X method was employed for optimization and the frequency calculation of all intermediates, and transition states. In order to test the reliability of the selected method, different computational levels including M06-2X/6-31G(d, p) (L1), B3LYP/6-31G(d, p) (L2), and  $\omega$ B97X-D/6-31G(d, p) (L3) were used for additionally computing the key step, and the calculated results had been shown in **Table S1**. There are small differences between the calculated results obtained by L1-3, but the trend and conclusions should be the same, indicating the computational method is reliable.

**Table S1.** Comparison of relative Gibbs free energies ( $\Delta\Delta G^\ddagger$ ) of the key step calculated by using different levels including M06-2X/6-31G(d, p) (L1), B3LYP/6-31G(d, p) (L2) and  $\omega$ B97X-D/6-31G(d, p) (L3) (Unit: kcal/mol).

|                           | L1   | L2   | L3   |
|---------------------------|------|------|------|
| <b>Int2</b>               | 0.0  | 0.0  | 0.0  |
| <b>TS1R</b>               | 20.1 | 18.8 | 19.5 |
| $\Delta\Delta G^\ddagger$ | 20.1 | 18.8 | 19.5 |

## 2. NCI and topology analyses of TS1S.

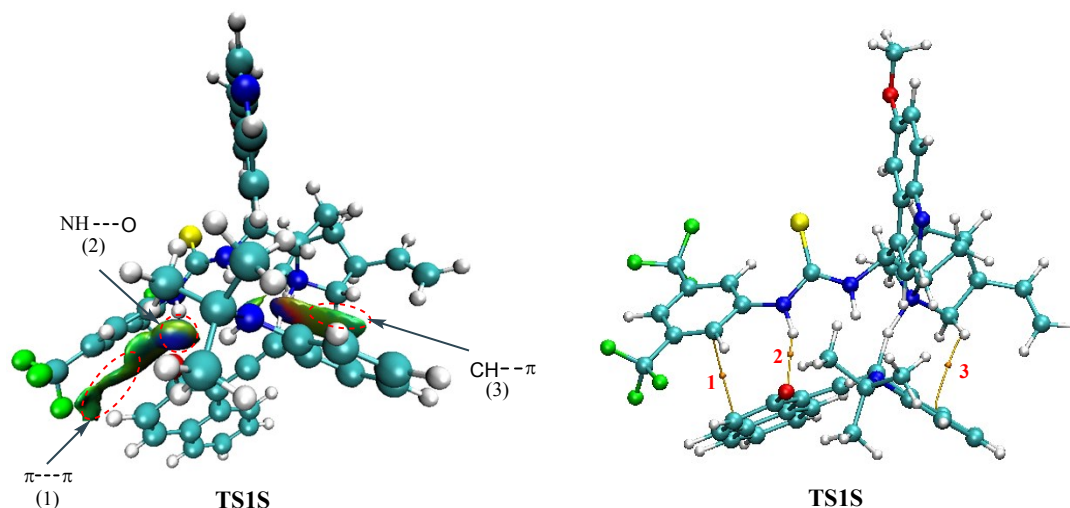

**Fig. S1** NCI analysis and topological analysis of bond critical points (BCPs) along the bond paths for the transition state **TS1S**.

**Table S2.** Summary of distances, types of interaction, electron densities ( $\rho_{\text{bcp}}$ ), Lagrangian kinetic energies ( $G_{\text{b}}$ ), potential energy densities ( $V_{\text{b}}$ ), energy densities ( $H_{\text{b}}$ ), and Laplacian of electron densities ( $\nabla^2\rho$ ) at the bond critical points (BCPs) along the bond paths in **TS1S** (bond lengths in Å,

other values in a.u.).

| BCP index | Type of interaction | Distance | $\rho_{\text{bcp}} \times 10^{-2}$ | $G_{\text{b}} \times 10^{-2}$ | $V_{\text{b}} \times 10^{-2}$ | $H_{\text{b}} \times 10^{-3}$ | $\nabla^2\rho \times 10^{-1}$ |
|-----------|---------------------|----------|------------------------------------|-------------------------------|-------------------------------|-------------------------------|-------------------------------|
| 1         | $\pi \cdots \pi$    | 3.15     | 0.8182                             | 0.5433                        | -0.4094                       | 1.3390                        | 0.2709                        |
| 2         | N-H $\cdots$ O      | 1.89     | 2.8975                             | 2.4994                        | -2.4617                       | 0.3770                        | 1.0148                        |
| 3         | C-H $\cdots$ $\pi$  | 2.70     | 0.8860                             | 0.5641                        | -0.4558                       | 1.0826                        | 0.2689                        |

**Table S3.** Summary of distances, types of interaction, electron densities ( $\rho_{\text{bcp}}$ ), Lagrangian kinetic energies ( $G_{\text{b}}$ ), potential energy densities ( $V_{\text{b}}$ ), energy densities ( $H_{\text{b}}$ ), and Laplacian of electron densities ( $\nabla^2\rho$ ) at the bond critical points (BCPs) along the bond paths in **TS1R** (bond lengths in Å, other values in a.u.).

| BCP index | Type of interaction | Distance | $\rho_{\text{bcp}} \times 10^{-2}$ | $G_{\text{b}} \times 10^{-2}$ | $V_{\text{b}} \times 10^{-2}$ | $H_{\text{b}} \times 10^{-3}$ | $\nabla^2\rho \times 10^{-1}$ |
|-----------|---------------------|----------|------------------------------------|-------------------------------|-------------------------------|-------------------------------|-------------------------------|
| 1         | $\pi \cdots \pi$    | 3.40     | 0.6100                             | 0.3549                        | -0.2833                       | 0.7165                        | 0.1706                        |
| 2         | $\pi \cdots \pi$    | 3.19     | 0.7747                             | 0.4849                        | -0.3724                       | 1.1252                        | <b>0.2390</b>                 |
| 3         | N-H $\cdots$ O      | 2.00     | 2.2874                             | 1.9351                        | -1.8042                       | 1.3096                        | <b>0.8264</b>                 |
| 4         | N-H $\cdots$ O      | 1.83     | 3.3297                             | 2.8490                        | -2.9987                       | 1.4969                        | <b>1.0797</b>                 |
| 5         | C-H $\cdots$ $\pi$  | 3.10     | 0.5062                             | 0.2756                        | -0.2344                       | 0.4128                        | 0.1268                        |
| 6         | C-H $\cdots$ $\pi$  | 2.62     | 0.8556                             | 0.5810                        | -0.4564                       | 1.2464                        | <b>0.2823</b>                 |
| 7         | C-H $\cdots$ $\pi$  | 2.64     | 0.8517                             | 0.5637                        | -0.4504                       | 1.1332                        | <b>0.2708</b>                 |

### 3. The structures of intermediates.

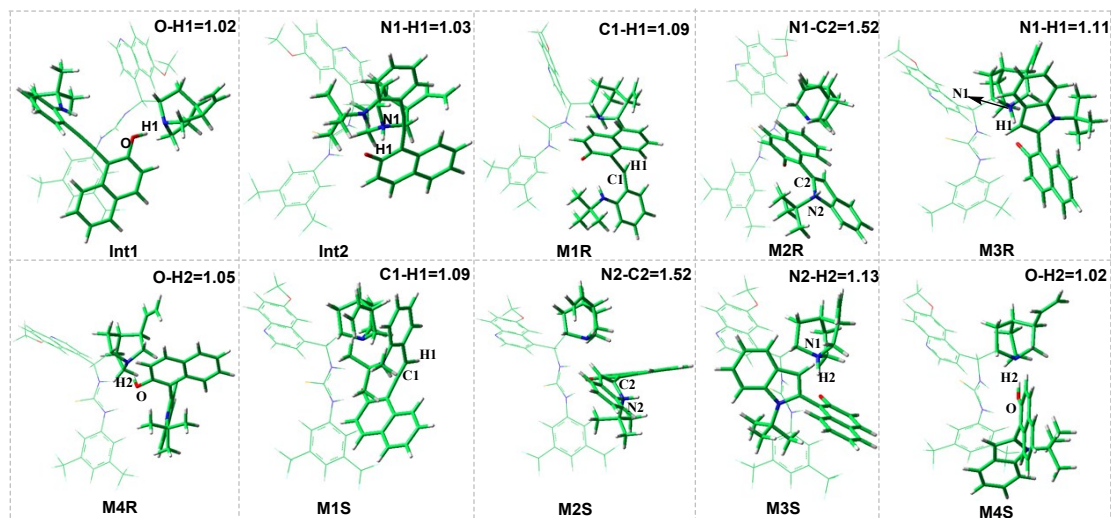

**Fig. S2.** Optimized geometries of intermediates for the catalytic cycle (Distances are in angstroms).

### 4. The volume of R

To obtain the relationship of substituents and transformation barriers, the three typical functional group H, methyl and tert-butyl were employed. The volume can be obtained from the output files of Gaussian. For function group H, the volume can be calculated from the H<sub>2</sub> molecule. When R=Me, the volume can be calculated from the CH<sub>4</sub> and H. So the tert-butyl is.

H<sub>2</sub>

Molar volume = 131.562 bohr<sup>3</sup>/mol (11.740 cm<sup>3</sup>/mol)

1/2 Molar volume = 1/2 \* [131.562 bohr<sup>3</sup>/mol ( 11.740 cm<sup>3</sup>/mol)] = 5.9 cm<sup>3</sup>/mol

5.9\*10<sup>24</sup>/6.02\*10<sup>23</sup>=9.8 Å<sup>3</sup>

Cavity volume = 1/2 \*22.672 Å<sup>3</sup>=11.4 Å<sup>3</sup>

CH<sub>4</sub>

Molar volume = 297.037 bohr<sup>3</sup>/mol (26.507 cm<sup>3</sup>/mol)

Molar volume = [297.037 bohr<sup>3</sup>/mol (26.507 cm<sup>3</sup>/mol)] -1/2 H<sub>2</sub> Molar volume = 20.6 cm<sup>3</sup>/mol

20.6\*10<sup>24</sup>/6.02\*10<sup>23</sup>=34.4 Å<sup>3</sup>

Cavity volume = 51.165 Å<sup>3</sup>-1/2 H<sub>2</sub> Cavity volume=39.8 Å<sup>3</sup>

*t*-Bu

Molar volume = 777.335 bohr<sup>3</sup>/mol (69.369 cm<sup>3</sup>/mol)

Molar volume = [777.335 bohr<sup>3</sup>/mol (69.369 cm<sup>3</sup>/mol)] -1/2 H<sub>2</sub> Molar volume = 63.5 cm<sup>3</sup>/mol

63.5\*10<sup>24</sup>/6.02\*10<sup>23</sup>=10.5\*10<sup>-23</sup>=63.5\*10<sup>24</sup>/6.02\*10<sup>23</sup>=105.5 Å<sup>3</sup>

Cavity volume = 128.663 Å<sup>3</sup>-1/2 H<sub>2</sub> Cavity volume=117.3 Å<sup>3</sup>

### 5. Energies of optimized structures

**Table S4.** The single-point, Gibbs free energy corrections (GFEC) and GFE (=E+GFEC) energies

of the stationary points involved in cinchonine-thiourea catalyzed asymmetric annulation. (unit: a.u.).

|             | GFE<br>(M06-2X/6-31G(d, p)<br>/IEF-PCM <sub>chloroform</sub> ) | E<br>(M06-2X/6-311+G(2df,<br>2pd)/IEF-PCM <sub>chloroform</sub> ) | GFE          |
|-------------|----------------------------------------------------------------|-------------------------------------------------------------------|--------------|
| <b>Cat</b>  | 0.471086                                                       | -2413.3639                                                        | -2412.892814 |
| <b>R1</b>   | 0.325829                                                       | -980.8502521                                                      | -980.5244231 |
| <b>Int1</b> | 0.826473                                                       | -3394.2600676                                                     | -3393.433595 |
| <b>TS1</b>  | 0.820546                                                       | -3394.2461878                                                     | -3393.425642 |
| <b>Int2</b> | 0.829187                                                       | -3394.2575679                                                     | -3393.428381 |
| <b>TS1R</b> | 0.824422                                                       | -3394.2208551                                                     | -3393.396433 |
| <b>M1R</b>  | 0.820802                                                       | -3394.2281904                                                     | -3393.407388 |
| <b>TS2R</b> | 0.821669                                                       | -3394.2167512                                                     | -3393.395082 |
| <b>M2R</b>  | 0.827528                                                       | -3394.2431104                                                     | -3393.415582 |
| <b>TS3R</b> | 0.829126                                                       | -3394.2371851                                                     | -3393.408059 |
| <b>M3R</b>  | 0.831019                                                       | -3394.2964493                                                     | -3393.46543  |
| <b>TS4R</b> | 0.828251                                                       | -3394.2883365                                                     | -3393.460086 |
| <b>M4R</b>  | 0.831043                                                       | -3394.2890416                                                     | -3393.457999 |
| <b>PR</b>   | 0.330127                                                       | -980.8990688                                                      | -980.5689418 |
| <b>TS1S</b> | 0.822346                                                       | -3394.2110924                                                     | -3393.388746 |
| <b>M1S</b>  | 0.818661                                                       | -3394.2258934                                                     | -3393.407232 |
| <b>TS2S</b> | 0.825318                                                       | -3394.2192505                                                     | -3393.393933 |
| <b>M2S</b>  | 0.829665                                                       | -3394.2475838                                                     | -3393.417919 |
| <b>TS3S</b> | 0.832034                                                       | -3394.241718                                                      | -3393.409684 |
| <b>M3S</b>  | 0.8271                                                         | -3394.3018981                                                     | -3393.474798 |
| <b>TS4S</b> | 0.826067                                                       | -3394.3008051                                                     | -3393.474738 |
| <b>M4S</b>  | 0.828133                                                       | -3394.3048107                                                     | -3393.476678 |
| <b>PS</b>   | 0.330099                                                       | -980.8990694                                                      | -980.5689704 |

## 6. Cartesian coordinates of all the stationary points

Cat

0 1

|   |             |             |             |
|---|-------------|-------------|-------------|
| C | -1.67154100 | -0.30487500 | 2.35581100  |
| C | -2.23148500 | -0.53149200 | 1.12714300  |
| C | -3.29762800 | -1.48303800 | 1.04191500  |
| C | -3.72559600 | -2.09696600 | 2.25442100  |
| C | -2.17059900 | -0.97892000 | 3.49716600  |
| H | -3.62054400 | -1.43770800 | -1.12145200 |
| H | -0.84308200 | 0.38626700  | 2.46879700  |
| C | -3.92840500 | -1.85258900 | -0.16815400 |
| C | -4.78452900 | -3.03527900 | 2.20862200  |
| H | -1.71862600 | -0.78357800 | 4.46789800  |
| C | -5.39445800 | -3.37276500 | 1.02711700  |
| C | -4.95329900 | -2.77633000 | -0.18121600 |
| H | -5.09775500 | -3.48461200 | 3.14520100  |
| H | -6.20143200 | -4.09524900 | 1.02632800  |
| O | -5.48898800 | -3.06333500 | -1.39486000 |
| C | -6.52963100 | -4.02390800 | -1.45378300 |
| H | -7.40391000 | -3.70074800 | -0.87876100 |
| H | -6.80108100 | -4.10789300 | -2.50512200 |
| H | -6.19194300 | -4.99889000 | -1.08683500 |
| C | -1.77697100 | 0.22056600  | -0.11087700 |
| H | -1.73905900 | -0.48313600 | -0.95047500 |
| C | -2.79838700 | 1.31682500  | -0.50171700 |
| C | -2.33859300 | 2.20575400  | -1.69234400 |
| H | -3.68281400 | 0.75260100  | -0.81470400 |
| C | -2.26003900 | 3.09519600  | 1.08438000  |
| C | -4.44860200 | 2.87943900  | 0.18675700  |
| C | -2.61606300 | 3.66822100  | -1.32339800 |

|   |             |             |             |
|---|-------------|-------------|-------------|
| H | -1.27269100 | 2.07827100  | -1.91244800 |
| H | -2.88544700 | 1.92845900  | -2.59714700 |
| H | -2.71909300 | 3.68485100  | 1.88302200  |
| H | -1.43086300 | 2.55601400  | 1.55211700  |
| C | -1.79331500 | 4.01970000  | -0.07684600 |
| C | -4.12088800 | 3.84119400  | -0.99259500 |
| H | -4.82486900 | 3.44654000  | 1.04320400  |
| H | -5.22408500 | 2.15784600  | -0.08225400 |
| H | -2.34293900 | 4.32449200  | -2.15597500 |
| H | -1.93364600 | 5.07210600  | 0.18807100  |
| H | -0.72521900 | 3.89396600  | -0.29766200 |
| H | -4.25185500 | 4.87765700  | -0.65434000 |
| N | -3.26786700 | 2.12811100  | 0.63289500  |
| C | -4.95325700 | 3.67625000  | -2.23907800 |
| C | -5.75209200 | 2.66328100  | -2.56760800 |
| H | -4.83478000 | 4.48645700  | -2.95987300 |
| H | -6.27273800 | 2.65645000  | -3.51959600 |
| H | -5.92621900 | 1.80918900  | -1.91998800 |
| N | -0.42492400 | 0.74669100  | 0.03000700  |
| H | -0.31319900 | 1.75185700  | 0.05439800  |
| C | 0.69035800  | -0.00589300 | -0.09182700 |
| S | 0.64463900  | -1.65807700 | -0.39475200 |
| N | 1.83716100  | 0.72103500  | 0.09251800  |
| H | 1.72620800  | 1.62959400  | 0.52631800  |
| C | 5.88639400  | -0.37378400 | -0.26651300 |
| C | 4.94240100  | -0.88206700 | -1.15400600 |
| C | 3.59788900  | -0.54900500 | -1.06124900 |
| C | 3.17393100  | 0.30068400  | -0.03594800 |
| C | 4.10904000  | 0.82347900  | 0.85758100  |
| C | 5.45250300  | 0.48828200  | 0.73104700  |

|   |             |             |             |
|---|-------------|-------------|-------------|
| H | 6.93349900  | -0.63992700 | -0.35533600 |
| H | 2.88488900  | -0.94314800 | -1.77248700 |
| H | 3.78821500  | 1.48983900  | 1.65226900  |
| C | 6.43498800  | 1.01684500  | 1.73779000  |
| F | 7.67395200  | 1.08504700  | 1.23219900  |
| F | 6.09850600  | 2.24444900  | 2.16023500  |
| F | 6.49674200  | 0.23378200  | 2.82606400  |
| C | 5.40831900  | -1.75145400 | -2.28834900 |
| F | 4.42702500  | -2.53172300 | -2.75784400 |
| F | 5.85471400  | -1.01503000 | -3.31912500 |
| F | 6.42039600  | -2.54772200 | -1.91418700 |
| N | -3.16178900 | -1.83511800 | 3.47032500  |

**R1**

0 1

|   |             |             |             |
|---|-------------|-------------|-------------|
| C | 1.94626500  | 2.87928300  | 0.08292700  |
| C | 1.78741000  | 1.50601300  | -0.15679000 |
| C | 2.91381000  | 0.69352100  | -0.43642200 |
| C | 4.17235000  | 1.30743400  | -0.47196300 |
| C | 4.31982900  | 2.66329100  | -0.20550300 |
| C | 3.20654900  | 3.45737700  | 0.07282200  |
| H | 1.06423500  | 3.47743500  | 0.28837300  |
| H | 5.03531100  | 0.71016300  | -0.74239600 |
| H | 5.30952300  | 3.10769200  | -0.23995400 |
| H | 3.32170800  | 4.51802000  | 0.26738300  |
| C | 0.48810600  | 0.91154200  | -0.12635500 |
| C | -0.58665900 | 0.34753600  | -0.11780600 |
| C | -1.83073200 | -0.34638000 | -0.11097500 |
| C | -3.07826800 | 0.34981000  | -0.00067500 |
| C | -1.82597300 | -1.72973100 | -0.21912700 |



|   |             |             |             |
|---|-------------|-------------|-------------|
| C | -3.14206500 | 1.76230200  | 0.11271000  |
| C | -4.29078200 | -0.39252400 | -0.00314000 |
| C | -3.03684900 | -2.46099600 | -0.22107100 |
| C | -4.35327600 | 2.40020900  | 0.21727600  |
| H | -2.21579400 | 2.32838000  | 0.11490600  |
| C | -5.52692700 | 0.29567200  | 0.10641100  |
| C | -4.23499500 | -1.80690200 | -0.11621300 |
| H | -3.00193500 | -3.54331600 | -0.30705900 |
| C | -5.56129300 | 1.66256500  | 0.21453400  |
| H | -4.38675300 | 3.48160200  | 0.30340100  |
| H | -6.44571800 | -0.28423200 | 0.10289900  |
| H | -5.16310800 | -2.37076500 | -0.11813500 |
| H | -6.51022700 | 2.18162200  | 0.29848600  |
| O | -0.62552600 | -2.35346500 | -0.32092000 |
| H | -0.75480700 | -3.30950100 | -0.36706100 |
| N | 2.76532500  | -0.67385800 | -0.74539100 |
| C | 3.19779400  | -1.69801600 | 0.24789600  |
| C | 4.69741800  | -1.61041900 | 0.52409600  |
| H | 4.95841700  | -0.69560900 | 1.06189200  |
| H | 4.99668400  | -2.45989100 | 1.14495500  |
| H | 5.26649800  | -1.64777800 | -0.40974400 |
| C | 2.41346400  | -1.54526400 | 1.55693700  |
| H | 1.34082700  | -1.65724900 | 1.36797300  |
| H | 2.72388100  | -2.30160100 | 2.28519800  |
| H | 2.58618800  | -0.55663800 | 1.99561400  |
| C | 2.88163300  | -3.04911000 | -0.39409600 |
| H | 3.44655200  | -3.17255300 | -1.32221100 |
| H | 3.13979000  | -3.86431900 | 0.28773900  |
| H | 1.81387900  | -3.12042700 | -0.62443900 |
| H | 1.78091100  | -0.85956800 | -0.93557000 |

**Int1**

0 1

|   |             |             |             |
|---|-------------|-------------|-------------|
| C | 4.20202000  | 3.41555300  | 0.50767900  |
| C | 5.49366600  | 2.39486500  | -1.07841000 |
| C | 4.80363900  | 1.15248200  | -0.94610200 |
| C | 3.74215300  | 1.09550400  | 0.01098700  |
| C | 3.45543300  | 2.23268200  | 0.72391900  |
| H | 7.06358800  | 3.44719900  | -2.09398600 |
| H | 3.96295100  | 4.30919800  | 1.08085800  |
| C | 6.55542100  | 2.49229300  | -2.01087900 |
| C | 5.20162000  | 0.06344900  | -1.75594500 |
| H | 2.65042100  | 2.24621700  | 1.45435800  |
| C | 6.24093000  | 0.19043800  | -2.65403300 |
| C | 6.93083100  | 1.42388800  | -2.78316900 |
| H | 4.69750600  | -0.89536500 | -1.71156100 |
| H | 7.74569000  | 1.53067000  | -3.48836900 |
| N | 5.18627900  | 3.50776500  | -0.35264600 |
| O | 6.54280000  | -0.91206400 | -3.38191200 |
| C | 7.59934600  | -0.82499500 | -4.32360200 |
| H | 8.55018500  | -0.58951600 | -3.83374100 |
| H | 7.66741100  | -1.80710800 | -4.78888800 |
| H | 7.38790000  | -0.07366100 | -5.09160400 |
| C | 2.92972000  | -0.16878000 | 0.25783000  |
| H | 3.13014600  | -0.89104100 | -0.53391400 |
| N | 1.50577000  | 0.10550400  | 0.21241800  |
| H | 1.06104400  | 0.32831700  | 1.09822800  |
| C | 0.68437000  | -0.19188300 | -0.81394700 |
| S | 1.21405100  | -0.79384700 | -2.29595900 |
| N | -0.61421200 | 0.10541400  | -0.53415400 |

|   |             |             |             |
|---|-------------|-------------|-------------|
| H | -0.80337200 | 0.47913600  | 0.39344800  |
| C | 3.26818600  | -0.78878700 | 1.62840300  |
| C | 4.74568000  | -1.26012800 | 1.70964000  |
| H | 3.07824000  | -0.02415800 | 2.39314200  |
| C | 2.43755300  | -2.97542300 | 0.91263200  |
| C | 2.77104900  | -2.48481700 | 3.25053900  |
| C | 4.75909900  | -2.79086900 | 1.78962400  |
| H | 5.30890600  | -0.92683800 | 0.83214300  |
| H | 5.23255800  | -0.83171600 | 2.59083400  |
| H | 1.88983600  | -3.84081600 | 1.29749000  |
| H | 1.91917200  | -2.63907500 | 0.00886700  |
| C | 3.91258300  | -3.34957500 | 0.63942000  |
| C | 4.11977700  | -3.23052300 | 3.12619200  |
| H | 1.97733000  | -3.14686700 | 3.61022800  |
| H | 2.84210800  | -1.64507800 | 3.94777000  |
| H | 5.78634200  | -3.16201700 | 1.72583800  |
| H | 4.02092400  | -4.43560400 | 0.57050100  |
| H | 4.25735900  | -2.93139900 | -0.31340300 |
| H | 3.92417300  | -4.30984100 | 3.04589400  |
| N | 2.34973800  | -1.91806100 | 1.94778500  |
| C | 5.06312400  | -3.04445200 | 4.28539200  |
| C | 4.82928100  | -2.41894400 | 5.43629900  |
| H | 6.04211100  | -3.50158600 | 4.13598900  |
| H | 5.59721000  | -2.36235300 | 6.20061800  |
| H | 3.87826700  | -1.95342100 | 5.67540500  |
| C | -1.77776300 | -0.37496300 | -1.17980500 |
| C | -2.86662400 | 0.48892600  | -1.25906800 |
| C | -1.90765100 | -1.70945100 | -1.56138300 |
| C | -4.09237200 | 0.00224000  | -1.70076600 |
| H | -2.76074100 | 1.51935300  | -0.92651500 |

|   |             |             |             |
|---|-------------|-------------|-------------|
| C | -3.13677500 | -2.16316400 | -2.02369000 |
| H | -1.07041500 | -2.38929300 | -1.45092900 |
| C | -4.24104200 | -1.32027000 | -2.09519900 |
| H | -5.20594800 | -1.69867000 | -2.41048100 |
| C | -3.26777700 | -3.60320100 | -2.42918300 |
| C | -5.27228700 | 0.93075600  | -1.70229800 |
| F | -6.43287200 | 0.26864900  | -1.80843400 |
| F | -5.22053700 | 1.80719700  | -2.71769900 |
| F | -5.32442800 | 1.65483200  | -0.57131300 |
| F | -2.56896700 | -4.41207200 | -1.61520500 |
| F | -4.54158900 | -4.01908700 | -2.41035300 |
| F | -2.80328400 | -3.81371500 | -3.67134400 |
| C | -5.89465400 | -1.54183600 | 0.90072000  |
| C | -4.78876000 | -0.86080800 | 1.34954400  |
| C | -3.54854300 | -1.52761700 | 1.51818600  |
| C | -3.47791700 | -2.91779400 | 1.23032000  |
| C | -4.63399700 | -3.59308100 | 0.76326300  |
| C | -5.81957400 | -2.92118500 | 0.59761600  |
| H | -4.84333100 | 0.20363700  | 1.55353800  |
| C | -2.36049100 | -0.83684700 | 1.93336400  |
| C | -2.23486400 | -3.58950500 | 1.37969700  |
| H | -4.55703200 | -4.65051400 | 0.52530400  |
| H | -6.69747300 | -3.44284900 | 0.23087300  |
| C | -1.11407900 | -2.92265600 | 1.79412200  |
| C | -1.16184800 | -1.53019300 | 2.06745000  |
| H | -2.18417000 | -4.65088500 | 1.15506500  |
| H | -0.17207700 | -3.44665800 | 1.92091000  |
| C | -2.37359500 | 0.58652500  | 2.07903800  |
| C | -2.42853800 | 1.80238400  | 2.09997300  |
| C | -2.58231700 | 3.22549800  | 2.18801000  |

|   |             |             |             |
|---|-------------|-------------|-------------|
| C | -3.34331000 | 3.75289100  | 3.23898800  |
| C | -2.01675700 | 4.08542100  | 1.20490900  |
| C | -3.57240400 | 5.11661500  | 3.34843000  |
| H | -3.75591400 | 3.06208400  | 3.96726300  |
| C | -2.26864500 | 5.46249000  | 1.33286000  |
| C | -3.03029400 | 5.96112200  | 2.38214800  |
| H | -4.16456500 | 5.51170500  | 4.16573900  |
| H | -1.86973600 | 6.15724700  | 0.60823600  |
| H | -3.19786500 | 7.03211700  | 2.44094900  |
| H | -6.83112900 | -1.01122900 | 0.75994100  |
| O | -0.05307200 | -0.85637600 | 2.42459900  |
| H | 0.80619500  | -1.37999600 | 2.23947000  |
| N | -1.29976600 | 3.52433700  | 0.16404200  |
| H | -0.98715500 | 2.58484400  | 0.37105300  |
| C | -0.40321200 | 4.22058500  | -0.78000100 |
| C | 0.33332000  | 3.11384000  | -1.54189800 |
| H | 0.98556800  | 3.55283800  | -2.30047000 |
| H | 0.95963400  | 2.52329700  | -0.86249900 |
| H | -0.37519600 | 2.44170300  | -2.03758600 |
| C | 0.64166400  | 5.08521000  | -0.05949100 |
| H | 1.35527200  | 5.48581500  | -0.78553100 |
| H | 0.20032800  | 5.92625500  | 0.47813900  |
| H | 1.19401000  | 4.47382000  | 0.66121500  |
| C | -1.21550800 | 5.03405900  | -1.79522600 |
| H | -1.77801700 | 5.85063600  | -1.34047000 |
| H | -0.53977100 | 5.46761600  | -2.53804000 |
| H | -1.92387600 | 4.37816500  | -2.30902000 |

**TS1**

0 1

|   |              |             |             |
|---|--------------|-------------|-------------|
| C | -3.56801600  | -1.22556400 | 1.91270300  |
| C | -3.47650100  | -1.48610800 | 0.56990100  |
| C | -4.46376400  | -2.33449700 | -0.02332100 |
| C | -5.48723300  | -2.83384800 | 0.83586000  |
| C | -4.62679800  | -1.77802000 | 2.67242300  |
| H | -3.711171000 | -2.37724800 | -2.07898700 |
| H | -2.82894600  | -0.60350900 | 2.40895000  |
| C | -4.47804200  | -2.70806400 | -1.38723300 |
| C | -6.48713100  | -3.67659100 | 0.29150000  |
| H | -4.68970400  | -1.56078100 | 3.73661100  |
| C | -6.48959800  | -4.02152800 | -1.03494000 |
| C | -5.46651800  | -3.53036200 | -1.88674600 |
| H | -7.25384700  | -4.04383900 | 0.96526600  |
| H | -7.26653600  | -4.67037700 | -1.42005400 |
| O | -5.38971400  | -3.82733100 | -3.20719400 |
| C | -6.37855200  | -4.68033900 | -3.76038000 |
| H | -7.37872500  | -4.24543900 | -3.66263500 |
| H | -6.13044400  | -4.78124000 | -4.81580900 |
| H | -6.36096500  | -5.66778400 | -3.28723100 |
| C | -2.35873200  | -0.84106000 | -0.23955100 |
| H | -2.28342400  | -1.34184600 | -1.20691700 |
| C | -2.66719400  | 0.65125100  | -0.44356200 |
| C | -4.01242300  | 0.88690300  | -1.16282100 |
| H | -2.68854200  | 1.13533800  | 0.54258200  |
| C | -1.64232000  | 1.03730300  | -2.65879800 |
| C | -1.76047100  | 2.83503300  | -1.01962700 |
| C | -3.85185200  | 2.07012000  | -2.12490200 |
| H | -4.30907900  | -0.00342600 | -1.72806300 |
| H | -4.79201700  | 1.07262700  | -0.41993500 |
| H | -0.73137900  | 1.43891800  | -3.10936100 |

|   |             |             |             |
|---|-------------|-------------|-------------|
| H | -1.60502400 | -0.04957300 | -2.76003000 |
| C | -2.92306600 | 1.64404100  | -3.26935200 |
| C | -3.20270200 | 3.25409600  | -1.37685700 |
| H | -1.01808100 | 3.31999600  | -1.65761300 |
| H | -1.49198400 | 3.06152500  | 0.01366300  |
| H | -4.82691900 | 2.37030600  | -2.51813000 |
| H | -2.67792200 | 2.50869200  | -3.89283400 |
| H | -3.41752800 | 0.90710100  | -3.90684000 |
| H | -3.15049200 | 4.09506400  | -2.08061500 |
| N | -1.58372000 | 1.36110700  | -1.20368900 |
| C | -4.05476100 | 3.69792600  | -0.21014200 |
| C | -3.64897300 | 4.08135200  | 0.99828200  |
| H | -5.12263300 | 3.72790200  | -0.43123200 |
| H | -4.36870200 | 4.40838700  | 1.74187800  |
| H | -2.60380800 | 4.12370400  | 1.29517000  |
| N | -1.06506300 | -0.96399700 | 0.40563100  |
| H | -0.68755300 | -0.13580800 | 0.85270800  |
| C | -0.18994800 | -1.96728000 | 0.17043200  |
| S | -0.65854700 | -3.42982900 | -0.51387200 |
| N | 1.08287800  | -1.60545400 | 0.51728100  |
| H | 1.24585900  | -0.59790500 | 0.38740400  |
| C | 4.58634200  | -3.92063000 | 0.76721700  |
| C | 3.36113000  | -4.45264000 | 1.16743700  |
| C | 2.18551500  | -3.72208000 | 1.08779800  |
| C | 2.22081900  | -2.41842900 | 0.57785700  |
| C | 3.44045000  | -1.86887700 | 0.18566200  |
| C | 4.60694000  | -2.62236600 | 0.28294800  |
| H | 5.49767500  | -4.50300400 | 0.83704700  |
| H | 1.25092700  | -4.15136000 | 1.42406100  |
| H | 3.47899000  | -0.85549900 | -0.20652800 |

|   |             |             |             |
|---|-------------|-------------|-------------|
| C | 5.89601600  | -1.97729400 | -0.13905200 |
| F | 6.91008200  | -2.85084200 | -0.17627500 |
| F | 5.79069800  | -1.42612500 | -1.35871300 |
| F | 6.24899700  | -0.98920900 | 0.69852700  |
| C | 3.32948600  | -5.86810600 | 1.67085800  |
| F | 3.44623800  | -6.75012800 | 0.66501000  |
| F | 4.34549700  | -6.11073400 | 2.51377900  |
| F | 2.19121000  | -6.15121500 | 2.31708200  |
| N | -5.55927900 | -2.54789200 | 2.16772600  |
| C | -0.73124000 | 6.19489400  | 0.83876700  |
| C | 0.05669300  | 5.11716100  | 1.26944700  |
| C | 0.01232400  | 4.69656900  | 2.62363400  |
| C | -0.85275300 | 5.36951800  | 3.49577100  |
| C | -1.65233000 | 6.41443500  | 3.04557300  |
| C | -1.58985500 | 6.83929300  | 1.71809800  |
| H | -0.67325800 | 6.49909500  | -0.20162500 |
| H | -0.86084300 | 5.09598300  | 4.54424300  |
| H | -2.31213600 | 6.91718300  | 3.74565300  |
| H | -2.20515500 | 7.66351900  | 1.37466500  |
| C | 0.87017700  | 4.38748800  | 0.34282500  |
| C | 1.49879200  | 3.66615200  | -0.40651900 |
| C | 2.13781800  | 2.75488300  | -1.30025200 |
| C | 3.17658300  | 3.18047000  | -2.19086900 |
| C | 1.70747800  | 1.42400600  | -1.28805000 |
| C | 3.64149400  | 4.52015400  | -2.22071800 |
| C | 3.76954900  | 2.23338800  | -3.07049600 |
| C | 2.30738000  | 0.49999400  | -2.19867800 |
| C | 4.64387700  | 4.89602700  | -3.08175500 |
| H | 3.19219800  | 5.24260500  | -1.54598700 |
| C | 4.80120300  | 2.65142600  | -3.94841600 |



|   |             |             |             |
|---|-------------|-------------|-------------|
| C | 3.30620600  | 0.88786400  | -3.04858300 |
| H | 1.93910000  | -0.52330600 | -2.19090600 |
| C | 5.23291100  | 3.95470400  | -3.95785100 |
| H | 4.98930300  | 5.92505600  | -3.08996800 |
| H | 5.24401700  | 1.91665000  | -4.61559300 |
| H | 3.75638700  | 0.16919500  | -3.72836900 |
| H | 6.02385000  | 4.26580700  | -4.63215100 |
| O | 0.76789600  | 0.99696100  | -0.45027200 |
| N | 0.87195100  | 3.67899900  | 3.07166800  |
| C | 0.32401400  | 2.37077200  | 3.51611400  |
| C | -0.27900800 | 2.46688700  | 4.91758000  |
| H | -1.21006000 | 3.03884700  | 4.91746100  |
| H | -0.51005100 | 1.46366500  | 5.28827300  |
| H | 0.42828900  | 2.93953800  | 5.60475000  |
| C | -0.72318400 | 1.84718400  | 2.52400400  |
| H | -0.28057400 | 1.82015500  | 1.51860700  |
| H | -1.04113600 | 0.83935900  | 2.81770500  |
| H | -1.61172100 | 2.48854300  | 2.50841100  |
| C | 1.51853800  | 1.41468500  | 3.53299900  |
| H | 2.29982200  | 1.79124200  | 4.19900900  |
| H | 1.21026000  | 0.42416200  | 3.87766100  |
| H | 1.93672700  | 1.30852100  | 2.52462500  |
| H | -0.46317900 | 1.13691900  | -0.83529400 |
| H | 1.54749100  | 3.48771500  | 2.33563600  |

**Int2**

0 1

|   |            |            |            |
|---|------------|------------|------------|
| C | 2.42931300 | 1.32177500 | 1.35455000 |
| C | 1.97042200 | 1.90563000 | 0.20171500 |
| C | 2.07555100 | 3.32775600 | 0.07238000 |

|   |            |             |             |
|---|------------|-------------|-------------|
| C | 2.67201900 | 4.03112800  | 1.16224800  |
| C | 3.00294100 | 2.12007900  | 2.37630800  |
| H | 1.14707600 | 3.58097700  | -1.89334500 |
| H | 2.36365100 | 0.24876000  | 1.51091100  |
| C | 1.64421900 | 4.06007800  | -1.05745000 |
| C | 2.81363900 | 5.43683800  | 1.07341700  |
| H | 3.36732400 | 1.63846300  | 3.28255300  |
| C | 2.39409500 | 6.13104100  | -0.03215500 |
| C | 1.79811800 | 5.43056500  | -1.11183600 |
| H | 3.27134800 | 5.94778100  | 1.91373800  |
| H | 2.51793000 | 7.20626500  | -0.07047800 |
| O | 1.34890800 | 6.03905100  | -2.23719500 |
| C | 1.46945600 | 7.44873800  | -2.32901900 |
| H | 2.51864400 | 7.76137700  | -2.29829700 |
| H | 1.03921500 | 7.72401300  | -3.29078000 |
| H | 0.91576000 | 7.94881100  | -1.52756200 |
| C | 1.38765600 | 1.03127800  | -0.90326900 |
| H | 1.12254200 | 1.65029400  | -1.75906400 |
| C | 2.45406500 | 0.01012500  | -1.33980500 |
| C | 3.65683300 | 0.68769800  | -2.03393900 |
| H | 2.76410900 | -0.58709300 | -0.47543000 |
| C | 1.23483200 | -0.36393800 | -3.50172700 |
| C | 3.00278400 | -1.91499700 | -2.75482800 |
| C | 3.62471500 | 0.36236200  | -3.53342400 |
| H | 3.60151800 | 1.76957300  | -1.88037500 |
| H | 4.59549900 | 0.34068300  | -1.59406200 |
| H | 1.00592300 | -1.17875500 | -4.19131800 |
| H | 0.29918500 | 0.09290800  | -3.17588900 |
| C | 2.22542600 | 0.65444600  | -4.09312300 |
| C | 3.91387600 | -1.14274100 | -3.72276500 |

|   |             |             |             |
|---|-------------|-------------|-------------|
| H | 2.55451300  | -2.80482300 | -3.19962800 |
| H | 3.52531200  | -2.21109900 | -1.84454900 |
| H | 4.37540900  | 0.95701800  | -4.05948800 |
| H | 2.22263800  | 0.56958100  | -5.18189700 |
| H | 1.92011800  | 1.67658500  | -3.84615800 |
| H | 3.63739100  | -1.40008100 | -4.75442800 |
| N | 1.88417300  | -1.00843500 | -2.30671600 |
| C | 5.37538500  | -1.47069800 | -3.55885400 |
| C | 5.90910700  | -2.41728900 | -2.79112400 |
| H | 6.03483800  | -0.85565700 | -4.17050600 |
| H | 6.98313600  | -2.56711000 | -2.76970900 |
| H | 5.31590200  | -3.08859800 | -2.17582000 |
| N | 0.16772200  | 0.36298100  | -0.49781000 |
| H | 0.21178800  | -0.25234900 | 0.32023700  |
| C | -1.08901300 | 0.72175300  | -0.91069600 |
| S | -1.35251100 | 1.92497500  | -2.07226400 |
| N | -2.03038800 | -0.02946900 | -0.30295900 |
| H | -1.62629600 | -0.80405100 | 0.30727000  |
| C | -6.23382300 | -0.27096400 | -0.24500300 |
| C | -5.62206100 | 0.75651600  | -0.95207100 |
| C | -4.23904100 | 0.89700400  | -1.01673100 |
| C | -3.42557100 | -0.03047600 | -0.35556500 |
| C | -4.03336200 | -1.07068200 | 0.36615900  |
| C | -5.41467900 | -1.17955000 | 0.41500200  |
| H | -7.31238700 | -0.35773000 | -0.20189400 |
| H | -3.79961200 | 1.71729500  | -1.56561600 |
| H | -3.40454000 | -1.78633300 | 0.89225100  |
| C | -6.00674600 | -2.29823600 | 1.22429500  |
| F | -7.34348800 | -2.32439900 | 1.14789400  |
| F | -5.55618800 | -3.49491600 | 0.81535100  |

|   |             |             |             |
|---|-------------|-------------|-------------|
| F | -5.68082100 | -2.18910900 | 2.52192500  |
| C | -6.46859600 | 1.73043300  | -1.72263000 |
| F | -5.95781400 | 2.96971600  | -1.69008600 |
| F | -6.56283300 | 1.38479500  | -3.01741000 |
| F | -7.71918100 | 1.79491500  | -1.24354000 |
| N | 3.12837000  | 3.42139400  | 2.29501100  |
| C | 4.04045000  | -1.53530700 | 4.06873500  |
| C | 2.75056900  | -1.39174500 | 3.54321300  |
| C | 1.80270900  | -0.51195500 | 4.15624000  |
| C | 2.22986600  | 0.16674700  | 5.31767900  |
| C | 3.51554200  | 0.00585400  | 5.81761700  |
| C | 4.43795600  | -0.83920600 | 5.20056500  |
| H | 4.72593600  | -2.20935300 | 3.56431600  |
| H | 1.55598800  | 0.83268400  | 5.83599500  |
| H | 3.79657400  | 0.55509100  | 6.71110700  |
| H | 5.43918800  | -0.95637500 | 5.59866300  |
| C | 2.34480600  | -2.09437800 | 2.37211600  |
| C | 1.85345500  | -2.61132600 | 1.38593900  |
| C | 1.13379000  | -3.10764800 | 0.26411800  |
| C | 1.70566500  | -4.01017800 | -0.68676000 |
| C | -0.20651500 | -2.66301300 | 0.15093200  |
| C | 3.03238800  | -4.50242700 | -0.56095200 |
| C | 0.94036800  | -4.40431500 | -1.82070400 |
| C | -0.93628100 | -3.07143200 | -1.02273600 |
| C | 3.56968100  | -5.32807300 | -1.52017000 |
| H | 3.61620800  | -4.20863700 | 0.30702600  |
| C | 1.51935600  | -5.26331700 | -2.78864200 |
| C | -0.38463700 | -3.89865300 | -1.96185600 |
| H | -1.95562800 | -2.71140700 | -1.13499100 |
| C | 2.81096400  | -5.71242600 | -2.65155500 |

|   |             |             |             |
|---|-------------|-------------|-------------|
| H | 4.58549600  | -5.69464200 | -1.40721800 |
| H | 0.92065800  | -5.55536700 | -3.64748300 |
| H | -0.96094000 | -4.18984500 | -2.83633300 |
| H | 3.24717000  | -6.36698100 | -3.39837200 |
| O | -0.73604100 | -1.86846400 | 1.02968600  |
| N | 0.57253700  | -0.35340400 | 3.57650200  |
| C | -0.52858900 | 0.50501500  | 4.03745900  |
| C | -1.05499100 | 0.06579300  | 5.41276400  |
| H | -0.30474800 | 0.14447400  | 6.20105700  |
| H | -1.90976300 | 0.68602000  | 5.69867900  |
| H | -1.38528100 | -0.97586000 | 5.36413400  |
| C | -0.12461600 | 1.98766000  | 4.01992700  |
| H | 0.15047600  | 2.27820000  | 3.00105400  |
| H | -0.97359300 | 2.60038700  | 4.33766800  |
| H | 0.71969200  | 2.21788500  | 4.67148800  |
| C | -1.65510600 | 0.33036000  | 3.01610500  |
| H | -1.94868100 | -0.72013100 | 2.92795500  |
| H | -2.52559000 | 0.91950900  | 3.31560600  |
| H | -1.32337400 | 0.68022300  | 2.03425900  |
| H | 1.18198900  | -1.56776600 | -1.79986200 |
| H | 0.33324500  | -1.00981200 | 2.83491100  |

**TS1R**

0 1

|   |            |             |             |
|---|------------|-------------|-------------|
| C | 5.37381900 | -2.12303400 | -2.29521700 |
| C | 4.31211500 | -2.11167400 | -1.34174400 |
| C | 3.51798600 | -0.92420800 | -1.26707100 |
| C | 3.81477100 | 0.10879000  | -2.12057500 |
| H | 6.99236100 | -3.25910600 | -3.12750500 |
| H | 5.11251000 | 0.81197900  | -3.70708400 |

|   |             |             |             |
|---|-------------|-------------|-------------|
| C | 6.19013800  | -3.27570500 | -2.39727700 |
| C | 4.10557300  | -3.25695900 | -0.53811100 |
| H | 3.23782600  | 1.03096300  | -2.11706800 |
| C | 4.91688300  | -4.36538800 | -0.66492600 |
| C | 5.97816200  | -4.37538000 | -1.60665600 |
| H | 3.29838600  | -3.31394800 | 0.18390100  |
| H | 6.61944400  | -5.24209200 | -1.70941200 |
| N | 5.64908500  | -1.07707800 | -3.12664400 |
| O | 4.63499000  | -5.41122000 | 0.15044900  |
| C | 5.42005200  | -6.58568100 | 0.02871600  |
| H | 6.47182100  | -6.38730400 | 0.26011000  |
| H | 5.01820900  | -7.29088900 | 0.75439700  |
| H | 5.34081500  | -7.01446700 | -0.97574300 |
| C | 2.37116800  | -0.78152800 | -0.27634600 |
| H | 2.21712700  | -1.72049400 | 0.25185300  |
| N | 1.13334900  | -0.50106300 | -0.97096300 |
| H | 1.09620900  | 0.32477300  | -1.57411900 |
| C | -0.00261300 | -1.21484000 | -0.86425600 |
| S | -0.09735800 | -2.65673400 | 0.02336500  |
| N | -1.03437200 | -0.63262600 | -1.53921900 |
| H | -0.78776900 | 0.27131000  | -1.95178300 |
| C | 2.71467600  | 0.31686800  | 0.74872300  |
| C | 4.02584800  | -0.02467700 | 1.49950000  |
| H | 2.82514800  | 1.26835400  | 0.21185900  |
| C | 1.53932700  | -0.53457100 | 2.74108100  |
| C | 1.94026700  | 1.83265300  | 2.45973500  |
| C | 3.86430800  | 0.34418100  | 2.97810400  |
| H | 4.24474800  | -1.09644400 | 1.41640300  |
| H | 4.85951600  | 0.51435100  | 1.04290300  |
| H | 0.64316900  | -0.33619800 | 3.33438800  |

|   |             |             |             |
|---|-------------|-------------|-------------|
| H | 1.36602300  | -1.46605000 | 2.19645700  |
| C | 2.82045600  | -0.58775500 | 3.60446500  |
| C | 3.35265100  | 1.79694500  | 3.08671500  |
| H | 1.16625900  | 1.96045600  | 3.22143600  |
| H | 1.82339400  | 2.64609600  | 1.74142400  |
| H | 4.82265400  | 0.24804800  | 3.49660900  |
| H | 2.60807800  | -0.27478900 | 4.63142800  |
| H | 3.20421800  | -1.61072200 | 3.64528000  |
| H | 3.26416900  | 2.02959700  | 4.15574800  |
| N | 1.62931800  | 0.56222800  | 1.74566100  |
| C | 4.35990800  | 2.75959700  | 2.50648300  |
| C | 4.20078400  | 3.64286600  | 1.52369900  |
| H | 5.34166700  | 2.68612100  | 2.97688700  |
| H | 5.03135000  | 4.26759700  | 1.21121600  |
| H | 3.26230300  | 3.79945900  | 0.99909300  |
| C | -2.41873500 | -0.85246600 | -1.46231300 |
| C | -3.02475300 | -2.06548300 | -1.12769200 |
| C | -3.22434700 | 0.25288300  | -1.76789300 |
| C | -4.41287100 | -2.13077300 | -1.05177400 |
| H | -2.42742400 | -2.93876100 | -0.91483900 |
| C | -4.60425900 | 0.15209800  | -1.70551600 |
| H | -2.76079900 | 1.20189000  | -2.02222000 |
| C | -5.22100000 | -1.03797500 | -1.33308600 |
| H | -6.30186000 | -1.10750600 | -1.26324200 |
| C | -5.46756300 | 1.32047900  | -2.08568600 |
| C | -5.08292600 | -3.42016400 | -0.67180300 |
| F | -4.20800600 | -4.37305900 | -0.32633900 |
| F | -5.82855300 | -3.90636200 | -1.67733900 |
| F | -5.91829500 | -3.24760000 | 0.36880000  |
| F | -6.45704600 | 1.51921800  | -1.19993000 |

|   |             |             |             |
|---|-------------|-------------|-------------|
| F | -4.77330400 | 2.46118800  | -2.18402900 |
| F | -6.06065700 | 1.11644800  | -3.27546700 |
| C | 1.22783900  | 6.07559000  | 1.46689700  |
| C | 0.70032300  | 4.88987800  | 0.98320600  |
| C | 1.04444500  | 4.42283400  | -0.29688800 |
| C | 1.90670300  | 5.20560200  | -1.09576900 |
| C | 2.43217500  | 6.40709200  | -0.58883500 |
| C | 2.10573700  | 6.83837000  | 0.68409800  |
| H | 0.01598000  | 4.30578800  | 1.59275200  |
| C | 0.56054200  | 3.14276900  | -0.81890200 |
| C | 2.23114600  | 4.75389600  | -2.43027400 |
| H | 3.09882100  | 6.99355700  | -1.21521000 |
| H | 2.51620200  | 7.76480000  | 1.07060100  |
| C | 1.74250600  | 3.60652500  | -2.95330800 |
| C | 0.87413000  | 2.72768600  | -2.18184100 |
| H | 2.89056300  | 5.38065900  | -3.02626700 |
| H | 1.98709600  | 3.28700400  | -3.96078600 |
| C | -0.18152100 | 2.31084400  | -0.04147500 |
| C | -0.73575900 | 1.50057000  | 0.77445700  |
| C | -2.17076500 | 1.39969300  | 1.10872600  |
| C | -3.00224100 | 2.43807600  | 0.65932300  |
| C | -2.73708900 | 0.31734900  | 1.83479300  |
| C | -4.37004600 | 2.44287500  | 0.87331700  |
| H | -2.53813200 | 3.26019300  | 0.11941000  |
| C | -4.13708400 | 0.32154000  | 2.00344600  |
| C | -4.93360900 | 1.35660200  | 1.53660600  |
| H | -4.98451800 | 3.25719600  | 0.50669600  |
| H | -4.62055700 | -0.50897900 | 2.49313400  |
| H | -6.00767300 | 1.30258600  | 1.68633100  |
| C | -2.37558700 | -1.82661100 | 3.16870200  |



|   |             |             |             |
|---|-------------|-------------|-------------|
| H | 0.95463700  | 6.41638800  | 2.46037100  |
| O | 0.46852100  | 1.64895700  | -2.67775900 |
| H | 0.39914300  | 0.85274300  | 1.24620700  |
| N | -1.91493900 | -0.66702100 | 2.37476600  |
| H | -1.14080200 | -0.91414700 | 1.76471600  |
| C | -3.08811400 | -1.36705100 | 4.45080300  |
| H | -2.47876700 | -0.61231000 | 4.95655300  |
| H | -4.08218400 | -0.95126100 | 4.29146000  |
| H | -3.19606800 | -2.22558300 | 5.12003600  |
| C | -1.11214100 | -2.57164600 | 3.61905300  |
| H | -0.52051800 | -1.95954200 | 4.30606400  |
| H | -1.39761900 | -3.48930600 | 4.14029800  |
| H | -0.49225200 | -2.84751100 | 2.76114400  |
| C | -3.22779600 | -2.80860700 | 2.34796000  |
| H | -2.62006200 | -3.22938500 | 1.54145900  |
| H | -3.57350300 | -3.62921100 | 2.98514900  |
| H | -4.10382400 | -2.34098400 | 1.89525600  |
| C | 4.88801100  | -0.01441600 | -3.03596700 |

**MIR**

0 1

|   |            |             |             |
|---|------------|-------------|-------------|
| C | 1.96027400 | 0.40514600  | -2.20442600 |
| C | 2.43595900 | -0.74707500 | -1.63784900 |
| C | 3.79259500 | -1.11630400 | -1.93625500 |
| C | 4.57563500 | -0.18964800 | -2.68350400 |
| C | 2.82321800 | 1.24600200  | -2.95520400 |
| H | 3.81467200 | -3.11210600 | -1.04209400 |
| H | 0.92356400 | 0.69348600  | -2.09277300 |
| C | 4.37942200 | -2.34452100 | -1.55832500 |
| C | 5.92810000 | -0.50192200 | -2.95995200 |

|   |             |             |             |
|---|-------------|-------------|-------------|
| H | 2.42606600  | 2.17216100  | -3.36852900 |
| C | 6.49192000  | -1.68472100 | -2.55220300 |
| C | 5.69883700  | -2.62662600 | -1.85176500 |
| H | 6.50537500  | 0.22725600  | -3.51849400 |
| H | 7.52944100  | -1.89368200 | -2.78204300 |
| O | 6.15965400  | -3.83097400 | -1.43375500 |
| C | 7.50858800  | -4.16529900 | -1.71542700 |
| H | 8.19954900  | -3.45918100 | -1.24267800 |
| H | 7.66451500  | -5.15807800 | -1.29635500 |
| H | 7.69528500  | -4.19243600 | -2.79417600 |
| C | 1.56023900  | -1.63263800 | -0.75622500 |
| H | 1.43669800  | -2.59657100 | -1.26390700 |
| C | 2.21492000  | -1.94553200 | 0.62319300  |
| C | 2.03593000  | -3.41456400 | 1.05909700  |
| H | 3.28047700  | -1.74755900 | 0.51617500  |
| C | 0.55003000  | -1.55333400 | 2.41963900  |
| C | 2.89998600  | -1.12096500 | 2.76702200  |
| C | 2.11559000  | -3.47419600 | 2.59026600  |
| H | 1.06932500  | -3.80033800 | 0.71509500  |
| H | 2.81766600  | -4.02632600 | 0.59733300  |
| H | 0.22543300  | -0.77204800 | 3.11076000  |
| H | -0.21710800 | -1.65866400 | 1.65385100  |
| C | 0.81303900  | -2.88920600 | 3.14651900  |
| C | 3.28776800  | -2.58772700 | 3.07800000  |
| H | 2.52888700  | -0.61946000 | 3.66447200  |
| H | 3.73660000  | -0.53164500 | 2.38238400  |
| H | 2.25882000  | -4.50308300 | 2.93189000  |
| H | 0.89659000  | -2.73691700 | 4.22734400  |
| H | -0.01962100 | -3.57570800 | 2.97226200  |
| H | 3.34705100  | -2.69950900 | 4.16811400  |

|   |             |             |             |
|---|-------------|-------------|-------------|
| N | 1.79999900  | -1.07020800 | 1.75986900  |
| C | 4.59736700  | -3.08173500 | 2.51068900  |
| C | 5.47504600  | -2.43325200 | 1.74874800  |
| H | 4.81121300  | -4.12015800 | 2.76761800  |
| H | 6.37189100  | -2.92967800 | 1.39284500  |
| H | 5.34780800  | -1.39913900 | 1.43967900  |
| N | 0.22882600  | -1.07737500 | -0.62533100 |
| H | 0.15841300  | -0.09987700 | -0.34048900 |
| C | -0.93146800 | -1.69901300 | -0.95158600 |
| S | -1.02538200 | -3.32805000 | -1.37465300 |
| N | -1.98656400 | -0.83998500 | -0.89514900 |
| H | -1.73351100 | 0.15075200  | -0.89112400 |
| C | -6.15995000 | -1.25118900 | -1.20557800 |
| C | -5.39304500 | -2.32558600 | -0.76847200 |
| C | -4.00860400 | -2.24950200 | -0.66241700 |
| C | -3.36132200 | -1.06806800 | -1.03368200 |
| C | -4.11911100 | 0.01617200  | -1.48796600 |
| C | -5.50192800 | -0.07789100 | -1.55344400 |
| H | -7.23957500 | -1.32342200 | -1.26517200 |
| H | -3.44211500 | -3.09022600 | -0.28689800 |
| H | -3.61725000 | 0.93733300  | -1.77209500 |
| C | -6.28832600 | 1.14319500  | -1.93393100 |
| F | -7.50345100 | 0.83220500  | -2.40278000 |
| F | -6.46925700 | 1.95416100  | -0.87683200 |
| F | -5.66141800 | 1.86779200  | -2.87206300 |
| C | -6.07748600 | -3.62062900 | -0.43171600 |
| F | -6.19657600 | -4.41069500 | -1.51064400 |
| F | -5.40127700 | -4.31942300 | 0.49087300  |
| F | -7.31647900 | -3.41804600 | 0.04000000  |
| N | 4.08750000  | 0.99065300  | -3.17062000 |

|   |             |            |             |
|---|-------------|------------|-------------|
| C | 1.86037300  | 1.97693800 | 4.11369000  |
| C | 0.85670100  | 1.78941200 | 3.15919600  |
| C | -0.50079600 | 1.72234000 | 3.55179700  |
| C | -0.77910200 | 1.79828100 | 4.92672000  |
| C | 0.22561400  | 2.01177900 | 5.86275400  |
| C | 1.55471400  | 2.11699800 | 5.46253400  |
| H | 2.89277900  | 2.01827900 | 3.77697600  |
| H | -1.79516100 | 1.65310800 | 5.26754200  |
| H | -0.03473300 | 2.07190200 | 6.91477500  |
| H | 2.34351200  | 2.27972100 | 6.18867500  |
| C | 1.25203900  | 1.56428100 | 1.74469400  |
| C | 1.17404000  | 2.30968500 | 0.71842800  |
| C | 1.01520200  | 2.99442500 | -0.43945100 |
| C | 1.97987100  | 3.97285000 | -0.93132300 |
| C | -0.20277800 | 2.69575600 | -1.18286300 |
| C | 3.19223600  | 4.23203300 | -0.27346000 |
| C | 1.67826200  | 4.68227200 | -2.11413900 |
| C | -0.45268700 | 3.47982400 | -2.37981500 |
| C | 4.07776800  | 5.16882500 | -0.77791400 |
| H | 3.42820100  | 3.68589400 | 0.63517600  |
| C | 2.58832800  | 5.63254600 | -2.61011500 |
| C | 0.43793600  | 4.40709000 | -2.80472500 |
| H | -1.36894600 | 3.27481800 | -2.92283300 |
| C | 3.77846400  | 5.87704700 | -1.95091700 |
| H | 5.01312400  | 5.35506300 | -0.26002400 |
| H | 2.34129700  | 6.17070400 | -3.52099100 |
| H | 0.23339400  | 4.97103300 | -3.71197000 |
| H | 4.47817300  | 6.60938200 | -2.33847700 |
| O | -0.97729200 | 1.77344500 | -0.83233800 |
| N | -1.51485500 | 1.46835100 | 2.60988000  |

|   |             |            |            |
|---|-------------|------------|------------|
| C | -2.65934100 | 2.40912700 | 2.43639400 |
| C | -3.54185300 | 2.50720000 | 3.68239800 |
| H | -3.07139500 | 3.08681900 | 4.47925800 |
| H | -4.47128400 | 3.01751700 | 3.41367000 |
| H | -3.79407600 | 1.51198200 | 4.06094100 |
| C | -2.14298900 | 3.80009500 | 2.05177900 |
| H | -1.54665000 | 3.74112400 | 1.13443000 |
| H | -2.97269900 | 4.49344700 | 1.88197700 |
| H | -1.51166900 | 4.20719700 | 2.84870000 |
| C | -3.49289800 | 1.82266100 | 1.29491800 |
| H | -3.82564600 | 0.81012300 | 1.54572600 |
| H | -4.37389600 | 2.44061800 | 1.09898100 |
| H | -2.89560200 | 1.78434400 | 0.38003100 |
| H | 1.61850300  | 0.29498900 | 1.55146600 |
| H | -1.09836400 | 1.35675500 | 1.68566600 |

**TS2R**

0 1

|   |             |             |             |
|---|-------------|-------------|-------------|
| C | -3.71534600 | -0.57599600 | -2.00526200 |
| C | -4.03442500 | -0.52796200 | -0.67247000 |
| C | -5.41853300 | -0.46063700 | -0.31713600 |
| C | -6.36569700 | -0.46869100 | -1.38343800 |
| C | -4.73802000 | -0.56503700 | -2.98260000 |
| H | -5.21791800 | -0.32557700 | 1.85627000  |
| H | -2.67495900 | -0.61715700 | -2.31525600 |
| C | -5.89422800 | -0.36929400 | 1.01119800  |
| C | -7.74658800 | -0.41033200 | -1.07392300 |
| H | -4.46895600 | -0.59998600 | -4.03674500 |
| C | -8.18902100 | -0.33511800 | 0.22170900  |
| C | -7.24519200 | -0.30837200 | 1.27959100  |

|   |             |             |             |
|---|-------------|-------------|-------------|
| H | -8.44534200 | -0.42257800 | -1.90373000 |
| H | -9.25171400 | -0.28896100 | 0.42561500  |
| O | -7.59423600 | -0.22208500 | 2.58951700  |
| C | -8.96944500 | -0.10610300 | 2.90608900  |
| H | -9.53012000 | -0.99104400 | 2.58530600  |
| H | -9.02223000 | -0.02099300 | 3.99063600  |
| H | -9.40944100 | 0.78809400  | 2.45125200  |
| C | -2.92577300 | -0.63799000 | 0.36192800  |
| H | -3.30984900 | -0.35294600 | 1.34759400  |
| C | -2.42373800 | -2.09923000 | 0.38817400  |
| C | -3.48311600 | -3.09188900 | 0.92262500  |
| H | -2.16977400 | -2.35967100 | -0.64828900 |
| C | -1.40733000 | -2.14773600 | 2.58419400  |
| C | -0.55146800 | -3.51126200 | 0.81223100  |
| C | -2.75614200 | -4.10341300 | 1.82053900  |
| H | -4.25155700 | -2.57369900 | 1.50917700  |
| H | -3.99091900 | -3.58842800 | 0.09121900  |
| H | -0.43608000 | -2.11058200 | 3.08658800  |
| H | -1.91205700 | -1.20227400 | 2.80476200  |
| C | -2.24686000 | -3.36275700 | 3.06412700  |
| C | -1.53372700 | -4.68671400 | 1.06914700  |
| H | 0.34815600  | -3.61747500 | 1.42777200  |
| H | -0.21738800 | -3.48180400 | -0.22834100 |
| H | -3.43464600 | -4.91332900 | 2.10741500  |
| H | -1.63994700 | -4.03840800 | 3.67640500  |
| H | -3.09046600 | -3.03406400 | 3.67897500  |
| H | -1.05937100 | -5.40850400 | 1.74788900  |
| N | -1.15934900 | -2.21265500 | 1.13551500  |
| C | -1.98223300 | -5.45926400 | -0.14607600 |
| C | -1.70974600 | -5.22284500 | -1.42723400 |

|   |             |             |             |
|---|-------------|-------------|-------------|
| H | -2.62888100 | -6.30642200 | 0.08979500  |
| H | -2.11732000 | -5.86126100 | -2.20439800 |
| H | -1.07534500 | -4.40596200 | -1.75851400 |
| N | -1.77533400 | 0.18461000  | 0.04208500  |
| H | -0.89090000 | -0.29717400 | 0.21822800  |
| C | -1.76669000 | 1.53987600  | 0.04752400  |
| S | -3.15356600 | 2.45409100  | 0.31761400  |
| N | -0.51022700 | 2.01781400  | -0.18782900 |
| H | 0.20923900  | 1.28372600  | -0.24920200 |
| C | 1.36267600  | 5.78675500  | -0.20517400 |
| C | -0.01931600 | 5.70898600  | -0.32302300 |
| C | -0.70089500 | 4.49514600  | -0.32055000 |
| C | 0.02327300  | 3.30647300  | -0.17832600 |
| C | 1.42004400  | 3.37195800  | -0.06140000 |
| C | 2.06976700  | 4.59563600  | -0.07969700 |
| H | 1.87387300  | 6.74162800  | -0.21418300 |
| H | -1.77585100 | 4.46890400  | -0.43102500 |
| H | 1.98787700  | 2.45063700  | 0.04909700  |
| C | 3.56886700  | 4.60282300  | 0.00201800  |
| F | 4.01782300  | 3.75693800  | 0.94331300  |
| F | 4.12981200  | 4.21295200  | -1.15774700 |
| F | 4.05423000  | 5.81810000  | 0.28439700  |
| C | -0.82435100 | 6.97536800  | -0.40751200 |
| F | -0.09727300 | 7.99932600  | -0.87927700 |
| F | -1.89115100 | 6.83570300  | -1.20681600 |
| F | -1.28696500 | 7.34686900  | 0.79737000  |
| N | -6.01744500 | -0.52343800 | -2.70185100 |
| C | 5.24932900  | -1.66145800 | 3.58684600  |
| C | 4.87143000  | -1.68604900 | 2.24523100  |
| C | 5.83711200  | -1.58366700 | 1.23379900  |

|   |             |             |             |
|---|-------------|-------------|-------------|
| C | 7.18731400  | -1.54209700 | 1.57063100  |
| C | 7.56229800  | -1.52200300 | 2.91416400  |
| C | 6.59705700  | -1.56204200 | 3.91810900  |
| H | 4.49329300  | -1.73992300 | 4.36200200  |
| H | 7.94275400  | -1.52531600 | 0.79250600  |
| H | 8.61443500  | -1.47592300 | 3.17431500  |
| H | 6.89723900  | -1.54053700 | 4.96030100  |
| C | 3.51249300  | -1.96497300 | 1.78856900  |
| C | 3.18263300  | -2.04023300 | 0.51966800  |
| C | 2.33668000  | -2.16633000 | -0.53542800 |
| C | 2.39110000  | -3.33262900 | -1.41107800 |
| C | 1.39429400  | -1.08162500 | -0.78443500 |
| C | 3.31231700  | -4.37445700 | -1.21208900 |
| C | 1.50205100  | -3.41271900 | -2.50550800 |
| C | 0.50277700  | -1.24298600 | -1.93091100 |
| C | 3.33812100  | -5.46516100 | -2.06492700 |
| H | 3.99960800  | -4.32120500 | -0.37252400 |
| C | 1.53962700  | -4.52899400 | -3.35858900 |
| C | 0.56586300  | -2.33229000 | -2.72982100 |
| H | -0.19431500 | -0.43359600 | -2.12854000 |
| C | 2.44806000  | -5.54935600 | -3.14442900 |
| H | 4.05408700  | -6.26251800 | -1.89292500 |
| H | 0.84344600  | -4.57679000 | -4.19183200 |
| H | -0.10295300 | -2.41341700 | -3.58456100 |
| H | 2.47273600  | -6.40838800 | -3.80583100 |
| O | 1.33379900  | -0.06665700 | -0.05806900 |
| N | 5.30939800  | -1.59695800 | -0.09739900 |
| C | 5.39176000  | -0.33024900 | -0.89949400 |
| C | 4.79121400  | -0.64445700 | -2.27113300 |
| H | 4.84297200  | 0.24526900  | -2.90376900 |



|   |            |             |             |
|---|------------|-------------|-------------|
| H | 5.35346300 | -1.44378800 | -2.76727300 |
| H | 3.74749700 | -0.95258000 | -2.19651400 |
| C | 4.60691000 | 0.77130600  | -0.19005300 |
| H | 4.67734400 | 1.69617000  | -0.76954100 |
| H | 3.55181900 | 0.50589900  | -0.07882800 |
| H | 5.02471500 | 0.97016300  | 0.80222600  |
| C | 6.84483600 | 0.12358200  | -1.09151800 |
| H | 7.45780700 | -0.67673300 | -1.52070200 |
| H | 6.86610500 | 0.97075400  | -1.78300600 |
| H | 7.29395600 | 0.45083000  | -0.15089600 |
| H | 2.74341700 | -2.22075800 | 2.51602100  |
| H | 5.72327900 | -2.35338400 | -0.64242400 |

**M2R**

0 1

|   |             |             |             |
|---|-------------|-------------|-------------|
| C | -3.66473800 | -0.43426300 | -1.99131500 |
| C | -3.99111900 | -0.42628900 | -0.65946900 |
| C | -5.37771100 | -0.37859300 | -0.31018400 |
| C | -6.31920200 | -0.35743600 | -1.38122100 |
| C | -4.68241400 | -0.39901800 | -2.97308000 |
| H | -5.19073100 | -0.32200200 | 1.86818800  |
| H | -2.62211300 | -0.46280700 | -2.29532400 |
| C | -5.86177100 | -0.33783100 | 1.01799500  |
| C | -7.70205700 | -0.31756600 | -1.07756000 |
| H | -4.40741200 | -0.40238200 | -4.02632200 |
| C | -8.15235800 | -0.29035100 | 0.21734400  |
| C | -7.21453800 | -0.29574200 | 1.28065300  |
| H | -8.39603600 | -0.30569900 | -1.91142000 |
| H | -9.21642300 | -0.25813300 | 0.41682200  |
| O | -7.57142100 | -0.25980000 | 2.59131200  |

|   |             |             |             |
|---|-------------|-------------|-------------|
| C | -8.94944300 | -0.16940700 | 2.90277500  |
| H | -9.49907100 | -1.04735500 | 2.54534500  |
| H | -9.01025500 | -0.12538400 | 3.98936600  |
| H | -9.39570800 | 0.73664400  | 2.47853000  |
| C | -2.88766700 | -0.56258700 | 0.37735400  |
| H | -3.27593300 | -0.29813200 | 1.36766800  |
| C | -2.39307500 | -2.02692800 | 0.36696200  |
| C | -3.46514700 | -3.04014700 | 0.83329800  |
| H | -2.11393300 | -2.24516900 | -0.67275900 |
| C | -1.43194800 | -2.18806200 | 2.58100200  |
| C | -0.52927800 | -3.45359800 | 0.75680100  |
| C | -2.75491700 | -4.10134800 | 1.68678000  |
| H | -4.23902300 | -2.55025200 | 1.43702500  |
| H | -3.96443000 | -3.48830700 | -0.03032600 |
| H | -0.47502700 | -2.17019600 | 3.11126700  |
| H | -1.95090600 | -1.25912600 | 2.83633000  |
| C | -2.27169700 | -3.43114200 | 2.97904700  |
| C | -1.51605900 | -4.64213500 | 0.93006800  |
| H | 0.35938700  | -3.59202500 | 1.38258200  |
| H | -0.17341800 | -3.36319200 | -0.27296800 |
| H | -3.43840400 | -4.92604300 | 1.91412600  |
| H | -1.67120900 | -4.13783000 | 3.56225500  |
| H | -3.12701800 | -3.14140900 | 3.59745500  |
| H | -1.05535100 | -5.39902000 | 1.57988000  |
| N | -1.14789500 | -2.17599900 | 1.13862500  |
| C | -1.93780100 | -5.35015200 | -0.33321300 |
| C | -1.62942200 | -5.05192900 | -1.59324000 |
| H | -2.59508300 | -6.20374400 | -0.15570400 |
| H | -2.01936300 | -5.64896400 | -2.41163000 |
| H | -0.98328600 | -4.22281500 | -1.86623300 |

|   |             |             |             |
|---|-------------|-------------|-------------|
| N | -1.72946000 | 0.25343000  | 0.07875800  |
| H | -0.84400500 | -0.23417800 | 0.23945800  |
| C | -1.69786000 | 1.60777600  | 0.06229300  |
| S | -3.07377000 | 2.55375700  | 0.30501700  |
| N | -0.43163700 | 2.05080000  | -0.16919600 |
| H | 0.28062800  | 1.27830500  | -0.21735300 |
| C | 1.58799800  | 5.74209200  | -0.22387600 |
| C | 0.20051100  | 5.72395700  | -0.28837300 |
| C | -0.53566800 | 4.54089400  | -0.27076400 |
| C | 0.13909200  | 3.31879200  | -0.16982600 |
| C | 1.54286200  | 3.32654100  | -0.10139100 |
| C | 2.24537900  | 4.51839300  | -0.13417900 |
| H | 2.13822800  | 6.67476300  | -0.24533400 |
| H | -1.61458900 | 4.56343600  | -0.33925300 |
| H | 2.06665700  | 2.37802800  | -0.01256200 |
| C | 3.74477600  | 4.45344800  | -0.12033800 |
| F | 4.19543100  | 3.53568500  | 0.75317900  |
| F | 4.23872600  | 4.10228200  | -1.32193100 |
| F | 4.30112100  | 5.62726000  | 0.20460000  |
| C | -0.55442900 | 7.02239500  | -0.33510300 |
| F | 0.20828300  | 8.03079200  | -0.78506700 |
| F | -1.63011200 | 6.94483700  | -1.13174400 |
| F | -0.99831100 | 7.38105200  | 0.88110500  |
| N | -5.96383200 | -0.37000300 | -2.69889400 |
| C | 4.76902700  | -1.33599100 | 3.75396700  |
| C | 4.42353800  | -1.49110200 | 2.41499700  |
| C | 5.40899500  | -1.82931100 | 1.48574400  |
| C | 6.71437000  | -2.10765300 | 1.84264200  |
| C | 7.04835000  | -1.95691900 | 3.19150900  |
| C | 6.09336000  | -1.55943100 | 4.12717000  |

|   |             |             |             |
|---|-------------|-------------|-------------|
| H | 4.01792500  | -1.06970900 | 4.48948500  |
| H | 7.45523300  | -2.43590700 | 1.12386900  |
| H | 8.06519800  | -2.15819300 | 3.50874800  |
| H | 6.38178900  | -1.44626100 | 5.16669800  |
| C | 3.13930900  | -1.49768900 | 1.73046500  |
| C | 3.29643700  | -1.83544900 | 0.44235300  |
| C | 2.33071600  | -1.99820500 | -0.62573900 |
| C | 2.34463500  | -3.15655000 | -1.46294600 |
| C | 1.39074300  | -0.95366900 | -0.81399000 |
| C | 3.14963100  | -4.29614200 | -1.19118800 |
| C | 1.49821200  | -3.20575500 | -2.60540900 |
| C | 0.54021300  | -1.05286800 | -1.98480800 |
| C | 3.16130200  | -5.38242700 | -2.03778800 |
| H | 3.71043600  | -4.34719000 | -0.25958500 |
| C | 1.52932900  | -4.33225300 | -3.45695800 |
| C | 0.60821200  | -2.11049800 | -2.83958900 |
| H | -0.14085500 | -0.22612600 | -2.17117500 |
| C | 2.35707200  | -5.40071600 | -3.19553500 |
| H | 3.77731200  | -6.24324800 | -1.79670500 |
| H | 0.87532600  | -4.34263500 | -4.32557600 |
| H | -0.03095800 | -2.14332600 | -3.71939800 |
| H | 2.37235200  | -6.26130400 | -3.85510400 |
| O | 1.30930100  | 0.05322900  | -0.02521200 |
| N | 4.78936000  | -1.89744100 | 0.14971000  |
| C | 5.25827600  | -0.74895300 | -0.84559400 |
| C | 4.76489400  | -1.10185800 | -2.25004500 |
| H | 5.27667000  | -0.43714700 | -2.95002400 |
| H | 5.01865400  | -2.13184500 | -2.52255200 |
| H | 3.69242100  | -0.96048400 | -2.36737400 |
| C | 4.68570700  | 0.57083600  | -0.34966100 |

|   |            |             |             |
|---|------------|-------------|-------------|
| H | 5.04825200 | 1.36589000  | -1.00658600 |
| H | 3.59272900 | 0.56846100  | -0.36957300 |
| H | 5.02578700 | 0.79697400  | 0.66537600  |
| C | 6.78470700 | -0.71808900 | -0.85618400 |
| H | 7.21519400 | -1.69541100 | -1.09839600 |
| H | 7.08806200 | -0.02416400 | -1.64283000 |
| H | 7.20092400 | -0.35564700 | 0.08363800  |
| H | 2.17079300 | -1.32305700 | 2.17859100  |
| H | 5.02186600 | -2.78135400 | -0.31993500 |

**TS3R**

0 1

|   |             |             |             |
|---|-------------|-------------|-------------|
| C | 0.68453800  | 0.43348400  | -2.38004100 |
| C | 1.37957900  | -0.62757700 | -1.85757300 |
| C | 2.67159500  | -0.90943700 | -2.41604700 |
| C | 3.19322100  | 0.01723400  | -3.36620700 |
| C | 1.28745800  | 1.27538700  | -3.34888100 |
| H | 3.05653300  | -2.82752000 | -1.44123900 |
| H | -0.31255200 | 0.67756400  | -2.03352200 |
| C | 3.43717900  | -2.05449200 | -2.09903100 |
| C | 4.48645100  | -0.20162500 | -3.89855300 |
| H | 0.73268200  | 2.13730200  | -3.71628200 |
| C | 5.23101600  | -1.30132000 | -3.54977300 |
| C | 4.68945300  | -2.25062700 | -2.64683600 |
| H | 4.86602400  | 0.52479900  | -4.60937500 |
| H | 6.21391900  | -1.44313600 | -3.98189600 |
| O | 5.33746900  | -3.38132700 | -2.27315300 |
| C | 6.61617100  | -3.63228500 | -2.83161000 |
| H | 7.32995000  | -2.84728200 | -2.55912600 |
| H | 6.94641700  | -4.58105300 | -2.41143600 |

|   |             |             |             |
|---|-------------|-------------|-------------|
| H | 6.56419400  | -3.71639300 | -3.92218000 |
| C | 0.75923600  | -1.51477800 | -0.77488900 |
| H | 0.54177400  | -2.47291000 | -1.25843800 |
| C | 1.68558200  | -1.82727600 | 0.45856700  |
| C | 1.76934500  | -3.36764700 | 0.70926600  |
| H | 2.68126300  | -1.44668000 | 0.21656500  |
| C | 0.05153200  | -1.51518000 | 2.38153900  |
| C | 2.39856200  | -1.70196800 | 2.72999500  |
| C | 1.14448200  | -3.71287700 | 2.06300000  |
| H | 1.24511700  | -3.90931600 | -0.08275100 |
| H | 2.81498500  | -3.69667200 | 0.69426200  |
| H | 0.14716900  | -1.29760000 | 3.45037600  |
| H | -0.73950000 | -0.87612000 | 2.00816900  |
| C | -0.21524500 | -3.01134500 | 2.16794500  |
| C | 2.06141700  | -3.14207200 | 3.15997700  |
| H | 2.46019000  | -1.04227800 | 3.59698400  |
| H | 3.35741100  | -1.67932300 | 2.21281000  |
| H | 1.04034800  | -4.79674900 | 2.16641500  |
| H | -0.79787800 | -3.40341100 | 3.00680600  |
| H | -0.79382100 | -3.18072300 | 1.25185500  |
| H | 1.48865400  | -3.12251400 | 4.09810400  |
| N | 1.37562300  | -1.13729700 | 1.78110400  |
| C | 3.27086900  | -4.00315100 | 3.40859000  |
| C | 4.55002500  | -3.63576500 | 3.38293800  |
| H | 3.03290300  | -5.03987200 | 3.64867300  |
| H | 5.33544800  | -4.35489200 | 3.59027100  |
| H | 4.87071800  | -2.61997900 | 3.16733200  |
| N | -0.49583600 | -0.96855200 | -0.35299500 |
| H | -0.44960500 | -0.09265300 | 0.22948100  |
| C | -1.71925200 | -1.43460000 | -0.63301300 |

|   |             |             |             |
|---|-------------|-------------|-------------|
| S | -2.01191500 | -2.83395900 | -1.54232500 |
| N | -2.67421400 | -0.64518800 | -0.04393900 |
| H | -2.27835900 | 0.09981200  | 0.54429700  |
| C | -6.88264500 | -0.56365300 | -0.01684300 |
| C | -6.21288900 | -1.22697200 | -1.03742200 |
| C | -4.82467400 | -1.29078400 | -1.09342200 |
| C | -4.06976700 | -0.68700600 | -0.08220500 |
| C | -4.73442700 | -0.00885600 | 0.94973900  |
| C | -6.11977300 | 0.05070000  | 0.97015000  |
| H | -7.96567800 | -0.52209300 | 0.00769200  |
| H | -4.33329200 | -1.79668400 | -1.91186000 |
| H | -4.15949500 | 0.46515600  | 1.73998600  |
| C | -6.81487200 | 0.83337900  | 2.04751900  |
| F | -7.96578200 | 0.25177800  | 2.41519400  |
| F | -6.05643900 | 0.96296700  | 3.14453800  |
| F | -7.12275600 | 2.07369500  | 1.63414800  |
| C | -7.01836700 | -1.93745500 | -2.08893900 |
| F | -6.33796900 | -2.08353900 | -3.23322100 |
| F | -7.37759900 | -3.16759500 | -1.68546200 |
| F | -8.15216100 | -1.27788100 | -2.37257700 |
| N | 2.50272600  | 1.11104500  | -3.81025500 |
| C | 5.18423400  | 0.51877100  | -0.11168700 |
| C | 3.96620700  | 1.03826400  | 0.33112100  |
| C | 3.60256200  | 0.98687700  | 1.67744100  |
| C | 4.49487200  | 0.50893100  | 2.63100600  |
| C | 5.73133600  | 0.03468000  | 2.19248700  |
| C | 6.06430000  | 0.01056300  | 0.83424000  |
| H | 5.42528900  | 0.52311100  | -1.17103400 |
| H | 4.27525800  | 0.48572000  | 3.68915200  |
| H | 6.43986300  | -0.33129600 | 2.92783000  |

|   |             |             |             |
|---|-------------|-------------|-------------|
| H | 7.02241000  | -0.39192300 | 0.52293400  |
| C | 2.89392700  | 1.68233800  | -0.38092700 |
| C | 1.88592400  | 1.99377300  | 0.45884500  |
| C | 0.65894200  | 2.69145800  | 0.03917000  |
| C | 0.77848200  | 3.84613400  | -0.81223100 |
| C | -0.60654700 | 2.17027500  | 0.35490200  |
| C | 2.00759600  | 4.51865400  | -1.07212000 |
| C | -0.39462300 | 4.39723100  | -1.40984100 |
| C | -1.76362800 | 2.77291200  | -0.24504500 |
| C | 2.06879100  | 5.61229600  | -1.90280500 |
| H | 2.91650100  | 4.17315100  | -0.59398500 |
| C | -0.29893000 | 5.51547200  | -2.27397600 |
| C | -1.66010000 | 3.82149000  | -1.10880200 |
| H | -2.73354300 | 2.34989000  | 0.00489500  |
| C | 0.90898400  | 6.11386700  | -2.53212900 |
| H | 3.02457900  | 6.09965900  | -2.06952400 |
| H | -1.21295400 | 5.89672100  | -2.72232300 |
| H | -2.54843400 | 4.24660000  | -1.56940800 |
| H | 0.97236000  | 6.97055600  | -3.19455300 |
| O | -0.75462500 | 1.14390800  | 1.14922900  |
| N | 2.20687300  | 1.44858100  | 1.81316800  |
| H | 1.63596100  | 0.35322900  | 1.82791200  |
| C | 1.95088600  | 2.35508900  | 3.05332900  |
| C | 0.68173600  | 3.20019600  | 2.92562200  |
| H | -0.19210200 | 2.58210200  | 2.72488800  |
| H | 0.54741200  | 3.69504100  | 3.89102100  |
| H | 0.77661600  | 3.97495400  | 2.16500600  |
| C | 1.75445800  | 1.45084400  | 4.27090700  |
| H | 2.62489500  | 0.85046900  | 4.52941200  |
| H | 1.53493100  | 2.08104800  | 5.13583300  |



|   |            |            |             |
|---|------------|------------|-------------|
| H | 0.89497100 | 0.79096300 | 4.11314600  |
| C | 3.13404800 | 3.31414800 | 3.20857900  |
| H | 3.32850900 | 3.82495200 | 2.25896100  |
| H | 2.86886800 | 4.07211800 | 3.94940300  |
| H | 4.05102800 | 2.82584500 | 3.53757200  |
| H | 2.89256200 | 1.90187600 | -1.43984700 |

**M3R**

0 1

|   |             |            |             |
|---|-------------|------------|-------------|
| C | -1.06869500 | 2.61157400 | -2.33773300 |
| C | -0.64011600 | 3.13871700 | -1.14649800 |
| C | -0.54442400 | 4.56127200 | -1.03370600 |
| C | -0.93538100 | 5.32810100 | -2.17227400 |
| C | -1.42566300 | 3.46730500 | -3.40695300 |
| H | 0.25648700  | 4.70945900 | 0.99872800  |
| H | -1.12845500 | 1.53634900 | -2.47825800 |
| C | -0.08559900 | 5.24158600 | 0.11837900  |
| C | -0.86651700 | 6.74136100 | -2.10314000 |
| H | -1.76929600 | 3.03530700 | -4.34461600 |
| C | -0.42873000 | 7.38323800 | -0.97415900 |
| C | -0.02823200 | 6.61931100 | 0.15273100  |
| H | -1.17124600 | 7.30112600 | -2.98089800 |
| H | -0.38615900 | 8.46512100 | -0.95305700 |
| O | 0.42637400  | 7.17190600 | 1.30379800  |
| C | 0.53687900  | 8.58411500 | 1.37226200  |
| H | -0.43967800 | 9.06621100 | 1.25783500  |
| H | 0.93437900  | 8.80472900 | 2.36177700  |
| H | 1.22537300  | 8.96652100 | 0.61152900  |
| C | -0.31673900 | 2.19945400 | 0.00741500  |
| H | 0.21453600  | 2.75404900 | 0.78402600  |

|   |             |             |             |
|---|-------------|-------------|-------------|
| C | -1.62789400 | 1.63504400  | 0.58934800  |
| C | -2.45079000 | 2.70548600  | 1.34466700  |
| H | -2.21124500 | 1.19058300  | -0.22250500 |
| C | -0.44632900 | 0.90087200  | 2.65248000  |
| C | -2.65840700 | 0.02334500  | 2.10590100  |
| C | -2.44334000 | 2.38640100  | 2.84556600  |
| H | -2.02263900 | 3.69700200  | 1.17243800  |
| H | -3.47673200 | 2.72806600  | 0.96839800  |
| H | -0.41867400 | 0.05424400  | 3.34121200  |
| H | 0.55777300  | 1.02737900  | 2.24323700  |
| C | -0.99582900 | 2.18033800  | 3.31259000  |
| C | -3.22248600 | 1.06852600  | 3.08837000  |
| H | -2.44706200 | -0.92972200 | 2.59552100  |
| H | -3.32066500 | -0.16609400 | 1.25805700  |
| H | -2.91059200 | 3.20295500  | 3.40163500  |
| H | -0.95367000 | 2.08138100  | 4.39969400  |
| H | -0.38676300 | 3.04869100  | 3.04215600  |
| H | -2.99903500 | 0.74433200  | 4.11132000  |
| N | -1.35980100 | 0.49561800  | 1.53806200  |
| C | -4.71340900 | 1.27570000  | 2.98763500  |
| C | -5.46552500 | 1.12743800  | 1.89915400  |
| H | -5.17971400 | 1.63363900  | 3.90406000  |
| H | -6.52820000 | 1.34683000  | 1.92419600  |
| H | -5.07216900 | 0.78986600  | 0.94366800  |
| N | 0.54326100  | 1.09623000  | -0.38506200 |
| H | 0.12362200  | 0.16926900  | -0.46379400 |
| C | 1.88289300  | 1.10738400  | -0.17134000 |
| S | 2.75872200  | 2.53554000  | -0.00186800 |
| N | 2.38586400  | -0.15364900 | -0.05454000 |
| H | 1.68103300  | -0.85778500 | 0.21932600  |

|   |             |             |             |
|---|-------------|-------------|-------------|
| C | 6.39851100  | -1.37472600 | 0.27680600  |
| C | 6.03237900  | -0.40433600 | -0.65207900 |
| C | 4.71748000  | 0.02186200  | -0.78112800 |
| C | 3.73697700  | -0.51283400 | 0.05884300  |
| C | 4.09079200  | -1.47728400 | 1.00172400  |
| C | 5.41055300  | -1.90811600 | 1.09296600  |
| H | 7.42668100  | -1.70699200 | 0.35787600  |
| H | 4.44852800  | 0.75751300  | -1.52939300 |
| H | 3.33923300  | -1.87545800 | 1.67684000  |
| C | 5.74331000  | -3.00320800 | 2.06572500  |
| F | 7.04341200  | -3.01337600 | 2.38603000  |
| F | 5.04402100  | -2.88163200 | 3.20429000  |
| F | 5.45053500  | -4.21273800 | 1.56045900  |
| C | 7.08663000  | 0.23015900  | -1.51508600 |
| F | 6.60968300  | 0.55285100  | -2.72540100 |
| F | 7.55636700  | 1.36174200  | -0.96637100 |
| F | 8.13749500  | -0.58236500 | -1.69608400 |
| N | -1.37488500 | 4.77511500  | -3.33878100 |
| C | -4.63362100 | 0.52286000  | -1.92415400 |
| C | -3.98214700 | -0.57224600 | -1.33043800 |
| C | -4.70699000 | -1.49633600 | -0.53344600 |
| C | -6.10121900 | -1.35901600 | -0.39496500 |
| C | -6.72356000 | -0.28604800 | -1.01186500 |
| C | -5.99901700 | 0.66247300  | -1.75758200 |
| H | -4.06611100 | 1.23525700  | -2.51724300 |
| H | -6.70081900 | -2.06384800 | 0.16569800  |
| H | -7.79858900 | -0.17684000 | -0.91116800 |
| H | -6.52019500 | 1.49637900  | -2.21590800 |
| C | -2.63328700 | -1.03427400 | -1.35904300 |
| C | -2.55851100 | -2.17565300 | -0.60191300 |

|   |             |             |             |
|---|-------------|-------------|-------------|
| C | -1.37241400 | -3.05981100 | -0.58393100 |
| C | -1.41907100 | -4.28618200 | -1.32083700 |
| C | -0.18650300 | -2.64409300 | 0.02389200  |
| C | -2.56093000 | -4.67380000 | -2.07726900 |
| C | -0.29456000 | -5.15837500 | -1.32702000 |
| C | 0.93034900  | -3.54717500 | 0.00124800  |
| C | -2.59019000 | -5.86674300 | -2.75996500 |
| H | -3.41455800 | -4.00420200 | -2.12626400 |
| C | -0.35502400 | -6.38425400 | -2.03464200 |
| C | 0.87726600  | -4.75463200 | -0.62952400 |
| H | 1.83303600  | -3.23838300 | 0.52082100  |
| C | -1.48129500 | -6.74279400 | -2.73380300 |
| H | -3.47221900 | -6.13440600 | -3.33384400 |
| H | 0.51628800  | -7.03405300 | -2.01793500 |
| H | 1.73888000  | -5.41719100 | -0.62086400 |
| H | -1.51885600 | -7.68262700 | -3.27443300 |
| O | -0.01407200 | -1.47744800 | 0.62020700  |
| N | -3.81662800 | -2.45161800 | -0.04720900 |
| H | -0.90725400 | -0.38762200 | 1.04733000  |
| C | -4.20695600 | -3.47043200 | 0.97976700  |
| C | -2.99717200 | -4.21559300 | 1.55029100  |
| H | -2.23312700 | -3.52132200 | 1.91089200  |
| H | -3.35343800 | -4.80509900 | 2.39974600  |
| H | -2.54469100 | -4.89692400 | 0.83029800  |
| C | -4.87476200 | -2.76607300 | 2.17598500  |
| H | -5.67282300 | -2.07957200 | 1.90021200  |
| H | -5.29266900 | -3.52684700 | 2.84050100  |
| H | -4.13370200 | -2.20053000 | 2.74551400  |
| C | -5.15577000 | -4.49516000 | 0.34290300  |
| H | -4.63734100 | -5.04937700 | -0.44309300 |

|   |             |             |             |
|---|-------------|-------------|-------------|
| H | -5.48467900 | -5.20709900 | 1.10501100  |
| H | -6.04161500 | -4.02942200 | -0.09200900 |
| H | -1.81892900 | -0.65574600 | -1.96298100 |

**TS4R**

0 1

|   |             |             |             |
|---|-------------|-------------|-------------|
| C | -3.93287400 | -0.27917600 | -2.45202700 |
| C | -4.03564300 | -0.01789200 | -1.10941600 |
| C | -5.29629000 | 0.43046000  | -0.60359200 |
| C | -6.36424800 | 0.55216400  | -1.54221800 |
| C | -5.05777700 | -0.11643300 | -3.29515600 |
| H | -4.75985800 | 0.70878000  | 1.50039900  |
| H | -2.99039600 | -0.60309800 | -2.88481400 |
| C | -5.54128200 | 0.75699400  | 0.75064800  |
| C | -7.63338800 | 0.98332200  | -1.08381500 |
| H | -4.96265600 | -0.32781500 | -4.35817200 |
| C | -7.85452500 | 1.28515100  | 0.23477300  |
| C | -6.78959700 | 1.17230900  | 1.16562300  |
| H | -8.42849700 | 1.06834600  | -1.81683500 |
| H | -8.83602500 | 1.61259000  | 0.55429800  |
| O | -6.91892700 | 1.45753200  | 2.48426800  |
| C | -8.18270200 | 1.89661500  | 2.95483300  |
| H | -8.95246700 | 1.13354800  | 2.79891600  |
| H | -8.05934500 | 2.07204600  | 4.02238500  |
| H | -8.48712800 | 2.82840900  | 2.46691000  |
| C | -2.82220700 | -0.23559300 | -0.21565000 |
| H | -2.98747900 | 0.25284500  | 0.74703000  |
| C | -2.59368900 | -1.74643000 | -0.00319700 |
| C | -3.71309000 | -2.42125000 | 0.82640700  |
| H | -2.50558500 | -2.21328600 | -0.99169700 |

|   |             |             |             |
|---|-------------|-------------|-------------|
| C | -1.17196500 | -1.32043800 | 1.98247300  |
| C | -1.13388400 | -3.48175100 | 0.85120900  |
| C | -3.13325400 | -2.85059800 | 2.18185600  |
| H | -4.54528200 | -1.72761000 | 0.97600000  |
| H | -4.10720200 | -3.29190500 | 0.29460300  |
| H | -0.24396700 | -1.67742000 | 2.43798000  |
| H | -1.05760600 | -0.24750400 | 1.80653000  |
| C | -2.41679100 | -1.65622300 | 2.82869800  |
| C | -2.09633900 | -3.97270900 | 1.95017900  |
| H | -0.08635200 | -3.68135700 | 1.08457900  |
| H | -1.35330700 | -3.93251000 | -0.12016500 |
| H | -3.93467400 | -3.21072300 | 2.83255300  |
| H | -2.11908300 | -1.89556700 | 3.85252400  |
| H | -3.09450900 | -0.79759600 | 2.88196000  |
| H | -1.53530900 | -4.09078200 | 2.88798100  |
| N | -1.27608700 | -2.00776200 | 0.66469300  |
| C | -2.75089800 | -5.29788700 | 1.65926600  |
| C | -2.50410600 | -6.12210200 | 0.64440300  |
| H | -3.49739400 | -5.59199000 | 2.39754000  |
| H | -3.03972600 | -7.06122800 | 0.55553000  |
| H | -1.76150600 | -5.91931000 | -0.12159500 |
| N | -1.61122400 | 0.33577700  | -0.77606400 |
| H | -0.97309700 | -0.29927400 | -1.26129200 |
| C | -1.08186500 | 1.50785700  | -0.36939700 |
| S | -1.98731300 | 2.70884900  | 0.39302100  |
| N | 0.26021100  | 1.58633900  | -0.60586400 |
| H | 0.75060700  | 0.69681900  | -0.73600700 |
| C | 2.51661500  | 5.12716700  | -0.30977800 |
| C | 1.41609800  | 5.04906200  | -1.16209800 |
| C | 0.66965000  | 3.88722500  | -1.26217300 |

|   |             |             |             |
|---|-------------|-------------|-------------|
| C | 1.01622000  | 2.77354300  | -0.49048000 |
| C | 2.11320200  | 2.83196700  | 0.36394700  |
| C | 2.85459500  | 4.01369000  | 0.44327700  |
| H | 3.09541700  | 6.04101700  | -0.23673700 |
| H | -0.18073800 | 3.83129700  | -1.93195400 |
| H | 2.37206500  | 1.97282600  | 0.97968200  |
| C | 4.03950900  | 4.07297900  | 1.36520300  |
| F | 4.42769700  | 5.32962200  | 1.60657100  |
| F | 3.77653600  | 3.49249200  | 2.54419800  |
| F | 5.10605900  | 3.42803100  | 0.84928300  |
| C | 1.03066100  | 6.26628900  | -1.95462400 |
| F | 0.21707900  | 5.96473100  | -2.97444200 |
| F | 0.39604500  | 7.16980200  | -1.19227600 |
| F | 2.11075100  | 6.87957800  | -2.46260700 |
| N | -6.23399900 | 0.27644900  | -2.87142400 |
| C | 3.06978000  | -1.50446300 | 3.84788800  |
| C | 3.08359900  | -1.66192400 | 2.45355900  |
| C | 3.70348300  | -0.70179200 | 1.60736300  |
| C | 4.29098300  | 0.43699600  | 2.19522100  |
| C | 4.25857700  | 0.57265800  | 3.57453600  |
| C | 3.66139500  | -0.38870700 | 4.40659000  |
| H | 2.58860300  | -2.25508000 | 4.46857700  |
| H | 4.75781200  | 1.22266300  | 1.62399900  |
| H | 4.70176600  | 1.46099700  | 4.01264600  |
| H | 3.65666600  | -0.24464800 | 5.48200900  |
| C | 2.52610300  | -2.66183600 | 1.60735900  |
| C | 2.78412600  | -2.30209100 | 0.31353600  |
| C | 2.20442900  | -3.01492400 | -0.85365400 |
| C | 2.68481600  | -4.29461600 | -1.27142800 |
| C | 1.04314300  | -2.49169400 | -1.41346800 |

|   |             |             |             |
|---|-------------|-------------|-------------|
| C | 3.82712700  | -4.90810200 | -0.68495400 |
| C | 2.01204800  | -4.99120200 | -2.31677100 |
| C | 0.39239700  | -3.19462800 | -2.47146200 |
| C | 4.26986500  | -6.13441100 | -1.11494300 |
| H | 4.34417700  | -4.38854300 | 0.11596300  |
| C | 2.49598200  | -6.25553900 | -2.74138900 |
| C | 0.86234700  | -4.40202000 | -2.90833700 |
| H | -0.49302300 | -2.74204900 | -2.91032500 |
| C | 3.60091900  | -6.82057900 | -2.15683500 |
| H | 5.14350700  | -6.58333300 | -0.65273400 |
| H | 1.96974500  | -6.76886000 | -3.54190900 |
| H | 0.35604000  | -4.93241000 | -3.71058300 |
| H | 3.96386600  | -7.78771900 | -2.48842400 |
| O | 0.50205100  | -1.35826200 | -0.95208500 |
| N | 3.52501600  | -1.11339500 | 0.28161300  |
| H | -0.37261700 | -1.66898500 | -0.06356100 |
| C | 4.24105500  | -0.63042900 | -0.94656800 |
| C | 3.24961700  | -0.08985900 | -1.98145600 |
| H | 2.70708200  | 0.76667200  | -1.56998800 |
| H | 3.80948500  | 0.26179400  | -2.85329400 |
| H | 2.53648700  | -0.84195400 | -2.31216500 |
| C | 5.22055500  | 0.50139600  | -0.63302100 |
| H | 5.94980700  | 0.21878700  | 0.12920100  |
| H | 5.76509600  | 0.72393400  | -1.55371500 |
| H | 4.70789500  | 1.41726800  | -0.33446300 |
| C | 5.06040300  | -1.78711500 | -1.53531400 |
| H | 4.42771700  | -2.58529900 | -1.92110700 |
| H | 5.66971100  | -1.41131200 | -2.36195900 |
| H | 5.72909600  | -2.20228100 | -0.77491300 |
| H | 1.98195200  | -3.54568300 | 1.91185000  |



**M4R**

0 1

|   |             |             |             |
|---|-------------|-------------|-------------|
| C | -3.89105400 | -0.57648100 | -2.43850700 |
| C | -4.01507900 | -0.31083200 | -1.09839500 |
| C | -5.30361600 | 0.06379800  | -0.60294300 |
| C | -6.37172900 | 0.11740700  | -1.54759800 |
| C | -5.01919300 | -0.48802200 | -3.28826200 |
| H | -4.79653900 | 0.37939400  | 1.50315000  |
| H | -2.92870400 | -0.84735800 | -2.86424600 |
| C | -5.57479800 | 0.38159400  | 0.74848700  |
| C | -7.66569600 | 0.47902100  | -1.09888600 |
| H | -4.90631600 | -0.70289600 | -4.34893600 |
| C | -7.91095700 | 0.77654100  | 0.21650600  |
| C | -6.84700800 | 0.72767100  | 1.15397000  |
| H | -8.46051900 | 0.51391300  | -1.83650500 |
| H | -8.91118500 | 1.05084500  | 0.52814600  |
| O | -6.99998700 | 1.01037400  | 2.47096400  |
| C | -8.28764600 | 1.38445500  | 2.93192100  |
| H | -9.01708000 | 0.58355200  | 2.77142900  |
| H | -8.18119400 | 1.56656900  | 4.00022000  |
| H | -8.63556200 | 2.29945400  | 2.44112000  |
| C | -2.79547600 | -0.44181500 | -0.19745200 |
| H | -3.00108300 | 0.03587000  | 0.76211500  |
| C | -2.44200200 | -1.92787400 | 0.02183500  |
| C | -3.53909200 | -2.69221400 | 0.80927500  |
| H | -2.30569600 | -2.38314700 | -0.96809200 |
| C | -1.14412400 | -1.40308800 | 2.03355200  |
| C | -0.86892000 | -3.51739400 | 0.89586700  |
| C | -2.96088300 | -3.10436900 | 2.16970800  |

|   |             |             |             |
|---|-------------|-------------|-------------|
| H | -4.42355200 | -2.06416700 | 0.95474900  |
| H | -3.85873900 | -3.57781000 | 0.25209300  |
| H | -0.20207500 | -1.66771800 | 2.52379600  |
| H | -1.13322400 | -0.31922200 | 1.88417600  |
| C | -2.37034200 | -1.86572000 | 2.85602800  |
| C | -1.82281400 | -4.12524200 | 1.94805400  |
| H | 0.18155000  | -3.63579500 | 1.17493400  |
| H | -1.00363600 | -3.98605400 | -0.08366500 |
| H | -3.74537600 | -3.54767700 | 2.79047600  |
| H | -2.07394500 | -2.09933200 | 3.88230300  |
| H | -3.12691600 | -1.07477500 | 2.91086300  |
| H | -1.28761800 | -4.21753300 | 2.90443300  |
| N | -1.13111500 | -2.07022400 | 0.71135200  |
| C | -2.34722900 | -5.49568700 | 1.60735400  |
| C | -1.95724600 | -6.28930000 | 0.61274500  |
| H | -3.11951300 | -5.85803000 | 2.28715000  |
| H | -2.40304800 | -7.26954800 | 0.48057900  |
| H | -1.17901700 | -6.01482200 | -0.09363200 |
| N | -1.63424700 | 0.23198600  | -0.75331300 |
| H | -0.98121100 | -0.33457300 | -1.28796900 |
| C | -1.20104100 | 1.44497700  | -0.35978400 |
| S | -2.18186100 | 2.54658500  | 0.45800900  |
| N | 0.11452300  | 1.66187500  | -0.66396500 |
| H | 0.68760600  | 0.83078900  | -0.81656000 |
| C | 2.08777200  | 5.36497900  | -0.32784700 |
| C | 0.92798300  | 5.23958700  | -1.09146300 |
| C | 0.27263800  | 4.02544700  | -1.20598300 |
| C | 0.77156000  | 2.90446700  | -0.53446900 |
| C | 1.92711000  | 3.01070700  | 0.23361800  |
| C | 2.57670700  | 4.24465500  | 0.32416800  |

|   |             |             |             |
|---|-------------|-------------|-------------|
| H | 2.59493000  | 6.31930900  | -0.24325300 |
| H | -0.62204400 | 3.93566400  | -1.81112700 |
| H | 2.30327800  | 2.14616800  | 0.77822200  |
| C | 3.82070200  | 4.35118800  | 1.15940200  |
| F | 4.18556400  | 5.62110100  | 1.36267000  |
| F | 3.65939200  | 3.77505800  | 2.35923800  |
| F | 4.86836900  | 3.73167200  | 0.57684700  |
| C | 0.37124600  | 6.46227600  | -1.76459300 |
| F | -0.49709400 | 6.14984300  | -2.73446400 |
| F | -0.27268300 | 7.25248000  | -0.89216800 |
| F | 1.34415400  | 7.20575300  | -2.31326700 |
| N | -6.21864500 | -0.16018000 | -2.87414000 |
| C | 3.27641000  | -1.21096900 | 3.82791000  |
| C | 3.29397100  | -1.42141100 | 2.44050300  |
| C | 3.84410000  | -0.45449000 | 1.55519200  |
| C | 4.34775300  | 0.74817000  | 2.09174300  |
| C | 4.30991300  | 0.93566500  | 3.46433800  |
| C | 3.78935100  | -0.03464000 | 4.33751900  |
| H | 2.85118700  | -1.96703700 | 4.48165700  |
| H | 4.74841600  | 1.54294700  | 1.48366900  |
| H | 4.68502900  | 1.87231700  | 3.86380100  |
| H | 3.77838600  | 0.15133700  | 5.40638800  |
| C | 2.79470700  | -2.48535700 | 1.63624900  |
| C | 3.02169000  | -2.15361800 | 0.32973500  |
| C | 2.44950700  | -2.91645500 | -0.80920500 |
| C | 2.95746000  | -4.19273900 | -1.20930400 |
| C | 1.28063200  | -2.44685000 | -1.37813500 |
| C | 4.12270400  | -4.76170800 | -0.62602900 |
| C | 2.28568300  | -4.92277300 | -2.23174400 |
| C | 0.62948400  | -3.16449500 | -2.41368600 |

|   |             |             |             |
|---|-------------|-------------|-------------|
| C | 4.58737100  | -5.98644900 | -1.03566200 |
| H | 4.63710200  | -4.21053100 | 0.15502100  |
| C | 2.79257200  | -6.18618900 | -2.63450800 |
| C | 1.12013000  | -4.37280800 | -2.82831400 |
| H | -0.26634600 | -2.73502100 | -2.85284400 |
| C | 3.91742100  | -6.71028600 | -2.05154800 |
| H | 5.47830000  | -6.40536200 | -0.57889300 |
| H | 2.26848900  | -6.72910500 | -3.41622000 |
| H | 0.61989100  | -4.93006500 | -3.61530700 |
| H | 4.29769900  | -7.67650000 | -2.36601800 |
| O | 0.71293900  | -1.28778100 | -0.92726400 |
| N | 3.69053800  | -0.92695100 | 0.24770700  |
| H | 0.02141000  | -1.55696300 | -0.18510000 |
| C | 4.36340300  | -0.43979900 | -1.00261800 |
| C | 3.33327100  | 0.06721400  | -2.01730700 |
| H | 2.74079800  | 0.87660000  | -1.57933900 |
| H | 3.86238100  | 0.47337400  | -2.88455900 |
| H | 2.66617800  | -0.71979200 | -2.36418300 |
| C | 5.32580000  | 0.71563500  | -0.72091000 |
| H | 6.05091700  | 0.46932000  | 0.05767600  |
| H | 5.87504300  | 0.91374300  | -1.64417300 |
| H | 4.79852500  | 1.63393100  | -0.45948900 |
| C | 5.19602200  | -1.58213600 | -1.60141700 |
| H | 4.57727000  | -2.40272200 | -1.96210800 |
| H | 5.77029100  | -1.19945300 | -2.44946700 |
| H | 5.89704100  | -1.97035100 | -0.85618700 |
| H | 2.29312400  | -3.38200500 | 1.97413700  |

**PR**

0 1

|   |             |             |             |
|---|-------------|-------------|-------------|
| C | -3.33422700 | -1.79803900 | -1.64898400 |
| C | -2.26622700 | -1.04772300 | -1.13052700 |
| C | -2.45776000 | -0.20409200 | -0.00656000 |
| C | -3.72663800 | -0.11892000 | 0.59725000  |
| C | -4.76232500 | -0.86970800 | 0.06692000  |
| C | -4.57528400 | -1.70619400 | -1.04930600 |
| H | -3.17534900 | -2.44147000 | -2.50949500 |
| H | -3.92149100 | 0.50582400  | 1.45851700  |
| H | -5.74224400 | -0.80734400 | 0.52941800  |
| H | -5.41176400 | -2.27958200 | -1.43565700 |
| C | -0.89622600 | -0.92807800 | -1.50033600 |
| C | -0.30620400 | -0.04951000 | -0.63235400 |
| C | 1.14087900  | 0.27217300  | -0.69019200 |
| C | 2.09290700  | -0.58427700 | -0.05956800 |
| C | 1.58571500  | 1.34427100  | -1.43413600 |
| C | 1.69383800  | -1.68818000 | 0.74406700  |
| C | 3.48427600  | -0.31868700 | -0.20352500 |
| C | 2.97031200  | 1.60720400  | -1.58504900 |
| C | 2.62954400  | -2.48240600 | 1.35852100  |
| H | 0.63414600  | -1.89539600 | 0.85989500  |
| C | 4.42715500  | -1.16459200 | 0.43703900  |
| C | 3.89249700  | 0.79292800  | -0.98600300 |
| H | 3.28659600  | 2.46096400  | -2.17808100 |
| C | 4.01293500  | -2.22381700 | 1.20303300  |
| H | 2.30805000  | -3.32034400 | 1.96891500  |
| H | 5.48529000  | -0.95207800 | 0.30992000  |
| H | 4.95367200  | 0.99443400  | -1.10106500 |
| H | 4.73970400  | -2.86459700 | 1.69120400  |
| O | 0.65351300  | 2.17043500  | -1.97863100 |
| N | -1.24498900 | 0.40942500  | 0.29368000  |

|   |             |             |             |
|---|-------------|-------------|-------------|
| C | -1.08711100 | 1.38395700  | 1.41049600  |
| C | -1.38885900 | 0.66890800  | 2.73548000  |
| H | -0.65713900 | -0.12964700 | 2.89120200  |
| H | -1.30497100 | 1.38029700  | 3.56166500  |
| H | -2.38422800 | 0.22671900  | 2.76724800  |
| C | 0.33176500  | 1.94727100  | 1.51455000  |
| H | 0.60884700  | 2.51005200  | 0.62166900  |
| H | 0.33986000  | 2.63526900  | 2.36436000  |
| H | 1.07480600  | 1.17034500  | 1.70285500  |
| C | -2.01793200 | 2.57953700  | 1.15657800  |
| H | -3.06925900 | 2.30261400  | 1.08991900  |
| H | -1.90828900 | 3.30437000  | 1.96795000  |
| H | -1.73297900 | 3.06324800  | 0.21775900  |
| H | -0.38351100 | -1.43414900 | -2.30594000 |
| H | 1.08889800  | 2.86887000  | -2.48334400 |

**TS1S**

0 1

|   |            |             |             |
|---|------------|-------------|-------------|
| C | 5.24472800 | 2.26801200  | 1.98457000  |
| C | 4.34349100 | 2.07350700  | 0.89511800  |
| C | 3.48048200 | 0.93641800  | 0.96315900  |
| C | 3.55959300 | 0.12662300  | 2.06614700  |
| H | 6.80762700 | 3.50183900  | 2.78633400  |
| H | 4.53250600 | -0.22825300 | 3.97095900  |
| C | 6.13050300 | 3.37311200  | 1.94854600  |
| C | 4.35944600 | 2.99391400  | -0.17792700 |
| H | 2.91266300 | -0.74276600 | 2.15246900  |
| C | 5.23486600 | 4.05963100  | -0.18236900 |
| C | 6.13698400 | 4.25182100  | 0.89601900  |
| H | 3.66807800 | 2.91302900  | -1.00895000 |

|   |             |             |             |
|---|-------------|-------------|-------------|
| H | 6.82549200  | 5.08781100  | 0.89956100  |
| N | 5.30252700  | 1.44322200  | 3.06975300  |
| O | 5.16898600  | 4.88492800  | -1.25575200 |
| C | 6.03864300  | 6.00414000  | -1.29638800 |
| H | 7.08867400  | 5.69323200  | -1.29715200 |
| H | 5.81551900  | 6.52261200  | -2.22755600 |
| H | 5.85806500  | 6.67918000  | -0.45322400 |
| C | 2.50163400  | 0.57979100  | -0.14540600 |
| H | 2.47859000  | 1.38401900  | -0.87852600 |
| N | 1.14009100  | 0.45132500  | 0.34554600  |
| H | 0.91038600  | -0.41587400 | 0.83407400  |
| C | 0.18826800  | 1.39678700  | 0.18182300  |
| S | 0.51019500  | 2.89752200  | -0.53699900 |
| N | -1.02437000 | 1.02744200  | 0.66675500  |
| H | -1.09859200 | 0.13475800  | 1.16593800  |
| C | 2.93790400  | -0.72250200 | -0.83942200 |
| C | 4.29485900  | -0.55027200 | -1.57401800 |
| H | 2.99565700  | -1.51839500 | -0.08425300 |
| C | 1.59456800  | -0.12643300 | -2.81608200 |
| C | 2.44643600  | -2.37490000 | -2.52615900 |
| C | 4.03797500  | -0.56498700 | -3.08801800 |
| H | 4.76708100  | 0.39266500  | -1.28166000 |
| H | 4.98160400  | -1.35722200 | -1.30250200 |
| H | 0.96502900  | -0.59846200 | -3.57508900 |
| H | 1.00276500  | 0.65582100  | -2.33484300 |
| C | 2.90882500  | 0.42057500  | -3.42126200 |
| C | 3.57271700  | -1.97945000 | -3.49927200 |
| H | 1.60880400  | -2.86320900 | -3.03327500 |
| H | 2.80780400  | -3.05148400 | -1.74870500 |
| H | 4.95136900  | -0.29688000 | -3.62642600 |

|   |             |             |             |
|---|-------------|-------------|-------------|
| H | 2.80428100  | 0.53358000  | -4.50356000 |
| H | 3.14206900  | 1.41095700  | -3.01440400 |
| H | 3.16203700  | -1.90192500 | -4.51603400 |
| N | 1.91385400  | -1.17992500 | -1.82097900 |
| C | 4.71190800  | -2.96318300 | -3.55839000 |
| C | 4.79392000  | -4.14995900 | -2.96155600 |
| H | 5.54362100  | -2.63928500 | -4.18470800 |
| H | 5.67219500  | -4.77293900 | -3.09446000 |
| H | 4.00582700  | -4.55889800 | -2.33498800 |
| C | -2.26797800 | 1.67044200  | 0.50929900  |
| C | -2.64777300 | 2.32107600  | -0.66414600 |
| C | -3.18919300 | 1.53892900  | 1.55343300  |
| C | -3.92838000 | 2.85745200  | -0.76491800 |
| H | -1.95149300 | 2.41100800  | -1.48754900 |
| C | -4.47232200 | 2.04428600  | 1.40962200  |
| H | -2.90538900 | 1.00145200  | 2.45167500  |
| C | -4.85688700 | 2.72371900  | 0.25775500  |
| H | -5.85618300 | 3.13272100  | 0.15672400  |
| C | -5.50275400 | 1.81014600  | 2.47564000  |
| C | -4.32027500 | 3.52617100  | -2.05210100 |
| F | -5.40492000 | 4.29896900  | -1.90504400 |
| F | -4.60311100 | 2.62657700  | -3.00861200 |
| F | -3.33285800 | 4.29776800  | -2.52905900 |
| F | -4.98622100 | 1.22088600  | 3.56312400  |
| F | -6.08648400 | 2.95085000  | 2.86782300  |
| F | -6.48774800 | 1.00989000  | 2.02578600  |
| C | -4.20671300 | -2.92719100 | -3.68653000 |
| C | -3.23132200 | -2.72439900 | -2.72495700 |
| C | -3.57694000 | -2.26785900 | -1.44367500 |
| C | -4.93445500 | -2.01324800 | -1.15239100 |



|   |             |             |             |
|---|-------------|-------------|-------------|
| C | -5.91089600 | -2.21999100 | -2.14215100 |
| C | -5.55553400 | -2.67352500 | -3.39924900 |
| H | -2.18635100 | -2.91476300 | -2.95333200 |
| C | -2.57914400 | -2.02413600 | -0.40560600 |
| C | -5.29891800 | -1.55090800 | 0.16913200  |
| H | -6.95135200 | -2.01816300 | -1.90251900 |
| H | -6.31353400 | -2.83046700 | -4.15888600 |
| C | -4.39201600 | -1.34943400 | 1.15114200  |
| C | -2.96824700 | -1.54408000 | 0.91866900  |
| H | -6.35191400 | -1.36115100 | 0.36482100  |
| H | -4.68526000 | -1.00930300 | 2.13912300  |
| C | -1.26690100 | -2.32579600 | -0.54736500 |
| C | -0.01445800 | -2.54853100 | -0.55916700 |
| C | 0.72460200  | -3.68507300 | 0.05196300  |
| C | 1.05716400  | -4.81572100 | -0.69055600 |
| C | 1.13185400  | -3.56717300 | 1.40434600  |
| C | 1.81149300  | -5.84535700 | -0.13261800 |
| H | 0.71913300  | -4.87938300 | -1.72108000 |
| C | 1.88551000  | -4.61516700 | 1.95014600  |
| C | 2.22547800  | -5.73149600 | 1.18915800  |
| H | 2.06347000  | -6.72026700 | -0.72186700 |
| H | 2.20376600  | -4.57653600 | 2.98193200  |
| H | 2.81048200  | -6.52167900 | 1.64893100  |
| H | -3.92206300 | -3.28188800 | -4.67200400 |
| O | -2.13078700 | -1.30692700 | 1.82183100  |
| H | 0.82940000  | -1.69592600 | -1.17014400 |
| C | 4.48118700  | 0.42137900  | 3.09889800  |
| N | 0.77976300  | -2.38757500 | 2.09180800  |
| H | -0.15399500 | -2.09350400 | 1.79284000  |
| C | 0.82380500  | -2.25997700 | 3.57192000  |

|   |             |             |            |
|---|-------------|-------------|------------|
| C | 0.36743700  | -0.82361700 | 3.86117000 |
| H | 1.06325400  | -0.09905300 | 3.42414500 |
| H | -0.63376500 | -0.64681000 | 3.45749200 |
| H | 0.33549000  | -0.65610400 | 4.94122300 |
| C | -0.16437100 | -3.23466600 | 4.22587000 |
| H | 0.08227100  | -4.27217100 | 3.98298400 |
| H | -0.14395200 | -3.12352900 | 5.31431100 |
| H | -1.17885800 | -3.02491000 | 3.87204000 |
| C | 2.24901100  | -2.45290800 | 4.14008700 |
| H | 2.36068800  | -3.41204400 | 4.65238200 |
| H | 3.01192600  | -2.40561700 | 3.35885400 |
| H | 2.46649500  | -1.67202100 | 4.87430900 |

**MIS**

0 1

|   |             |             |             |
|---|-------------|-------------|-------------|
| C | -2.69909800 | -1.25462200 | -2.07541000 |
| C | -3.35879100 | -1.46167300 | -0.89077500 |
| C | -4.70167500 | -1.95213100 | -0.94676000 |
| C | -5.25196300 | -2.19636300 | -2.23965300 |
| C | -3.34450800 | -1.52866500 | -3.30444700 |
| H | -5.14448300 | -2.00251800 | 1.19435100  |
| H | -1.68406200 | -0.86912300 | -2.07599300 |
| C | -5.50860000 | -2.18749000 | 0.19043400  |
| C | -6.57991700 | -2.67804400 | -2.33873600 |
| H | -2.80881900 | -1.35926600 | -4.23673900 |
| C | -7.34578200 | -2.90579100 | -1.22437100 |
| C | -6.80055800 | -2.65277500 | 0.06034400  |
| H | -6.97504200 | -2.85769800 | -3.33312000 |
| H | -8.35868000 | -3.27259800 | -1.33462800 |
| O | -7.49088100 | -2.84274100 | 1.21412700  |

|   |             |             |             |
|---|-------------|-------------|-------------|
| C | -8.83567200 | -3.28034600 | 1.12283400  |
| H | -8.90385700 | -4.26873100 | 0.65554400  |
| H | -9.20159800 | -3.34063800 | 2.14676100  |
| H | -9.44909100 | -2.56864600 | 0.56004700  |
| C | -2.62267400 | -1.24779000 | 0.42084700  |
| H | -3.34044700 | -1.16109000 | 1.24302600  |
| C | -1.65826700 | -2.42653400 | 0.65512000  |
| C | -2.32752000 | -3.81505500 | 0.71393100  |
| H | -0.96510300 | -2.41404800 | -0.19660400 |
| C | -1.56045600 | -2.57468200 | 3.06446800  |
| C | 0.37236500  | -3.03273900 | 1.73259200  |
| C | -1.51440900 | -4.65974900 | 1.70979100  |
| H | -3.36649700 | -3.74553200 | 1.05921300  |
| H | -2.34552200 | -4.26671400 | -0.28229900 |
| H | -0.99106000 | -2.22462900 | 3.93037600  |
| H | -2.51497800 | -2.03928500 | 3.07421300  |
| C | -1.78334000 | -4.10927400 | 3.11669300  |
| C | -0.00042500 | -4.50551900 | 1.41601300  |
| H | 0.91222800  | -2.97036700 | 2.68410300  |
| H | 1.02892200  | -2.59924200 | 0.97439900  |
| H | -1.80131200 | -5.71391200 | 1.64184900  |
| H | -1.10402200 | -4.57871600 | 3.83680300  |
| H | -2.80584900 | -4.34148700 | 3.43033700  |
| H | 0.53456100  | -5.16624100 | 2.11234100  |
| N | -0.82701400 | -2.18966300 | 1.84806300  |
| C | 0.32519700  | -4.99063400 | 0.02457800  |
| C | 0.93123400  | -4.33505400 | -0.96255900 |
| H | 0.00756300  | -6.01812400 | -0.16470800 |
| H | 1.10707600  | -4.81703500 | -1.91951100 |
| H | 1.29906900  | -3.31662800 | -0.86725400 |

|   |             |             |             |
|---|-------------|-------------|-------------|
| N | -1.78329200 | -0.06358200 | 0.39540400  |
| H | -0.83287600 | -0.23243500 | 0.72502500  |
| C | -2.22637900 | 1.20685300  | 0.34457000  |
| S | -3.86404700 | 1.59670100  | 0.24450500  |
| N | -1.19043500 | 2.09678200  | 0.40405500  |
| H | -0.27131500 | 1.65954200  | 0.51218000  |
| C | -0.78322800 | 6.28419000  | 0.27839400  |
| C | -1.94031900 | 5.68968200  | -0.21475400 |
| C | -2.13835100 | 4.31420000  | -0.18770200 |
| C | -1.15507100 | 3.49314600  | 0.37827900  |
| C | 0.00449700  | 4.08281900  | 0.89582200  |
| C | 0.18724700  | 5.45706500  | 0.82744800  |
| H | -0.63920900 | 7.35666700  | 0.22837000  |
| H | -3.03500700 | 3.88087900  | -0.60721700 |
| H | 0.76854100  | 3.45544300  | 1.34817600  |
| C | 1.49084000  | 6.02043700  | 1.31546500  |
| F | 1.46873800  | 7.35682100  | 1.38645800  |
| F | 1.80969800  | 5.55365700  | 2.53197700  |
| F | 2.50286500  | 5.68047500  | 0.49735200  |
| C | -3.02569000 | 6.56965100  | -0.76905600 |
| F | -3.77356100 | 5.93258400  | -1.67969400 |
| F | -3.85793300 | 6.99343900  | 0.19585800  |
| F | -2.52077100 | 7.66655500  | -1.35452100 |
| N | -4.56860900 | -1.98684000 | -3.40250200 |
| C | 3.50221400  | -4.47958000 | 1.95840900  |
| C | 3.77197500  | -3.37113900 | 1.14935000  |
| C | 4.15806200  | -3.56048400 | -0.20740200 |
| C | 4.22917700  | -4.88132200 | -0.68485700 |
| C | 3.92994800  | -5.96111500 | 0.13472300  |
| C | 3.56466200  | -5.77539100 | 1.46557000  |

|   |            |             |             |
|---|------------|-------------|-------------|
| H | 3.22514800 | -4.30502500 | 2.99546800  |
| H | 4.52314000 | -5.07132300 | -1.70714400 |
| H | 3.99457500 | -6.96365700 | -0.27706200 |
| H | 3.33917400 | -6.62010600 | 2.10664300  |
| C | 3.64826500 | -2.04125000 | 1.77003700  |
| C | 3.57832900 | -0.85831800 | 1.21346900  |
| C | 3.60637500 | 0.34513400  | 0.65676600  |
| C | 4.88777500 | 1.00751200  | 0.32508100  |
| C | 2.31658700 | 0.97088700  | 0.24946000  |
| C | 6.11931600 | 0.49773600  | 0.74873700  |
| C | 4.86448700 | 2.15648700  | -0.48934000 |
| C | 2.40301100 | 2.13494500  | -0.62991300 |
| C | 7.30529700 | 1.10995300  | 0.36282800  |
| H | 6.14284300 | -0.38203000 | 1.38546800  |
| C | 6.06804900 | 2.76453700  | -0.87019700 |
| C | 3.59160800 | 2.68369700  | -0.95261400 |
| H | 1.46942100 | 2.54804200  | -0.99945100 |
| C | 7.28384600 | 2.24522100  | -0.45152900 |
| H | 8.25219400 | 0.70289000  | 0.70170100  |
| H | 6.03599400 | 3.64728800  | -1.50219700 |
| H | 3.61938100 | 3.56411800  | -1.58993800 |
| H | 8.21174800 | 2.71928600  | -0.75204700 |
| O | 1.23168200 | 0.53221000  | 0.64153800  |
| N | 4.41084700 | -2.44340400 | -0.97724000 |
| H | 4.78571800 | -1.66829300 | -0.44575800 |
| C | 4.81676400 | -2.37558500 | -2.38935200 |
| C | 6.17429400 | -3.04540100 | -2.65146600 |
| H | 6.15442800 | -4.12338500 | -2.48261600 |
| H | 6.47938800 | -2.87357700 | -3.68809400 |
| H | 6.93411700 | -2.61185700 | -1.99384600 |

|   |            |             |             |
|---|------------|-------------|-------------|
| C | 3.71446200 | -2.94626000 | -3.28840700 |
| H | 2.77750800 | -2.41106800 | -3.10911400 |
| H | 3.99519100 | -2.81561000 | -4.33740000 |
| H | 3.53490400 | -4.00932300 | -3.11985600 |
| C | 4.95233200 | -0.87623700 | -2.68711200 |
| H | 5.75949200 | -0.43160400 | -2.09239600 |
| H | 5.18395100 | -0.72114300 | -3.74369100 |
| H | 4.01964700 | -0.35211300 | -2.45057500 |
| H | 3.57631300 | -2.03998200 | 2.86030300  |

**TS2S**

0 1

|   |            |             |             |
|---|------------|-------------|-------------|
| C | 5.55501100 | 1.31387300  | 2.10375600  |
| C | 4.95186900 | 1.17186700  | 0.81866200  |
| C | 3.63543900 | 0.61323100  | 0.77391400  |
| C | 3.04845000 | 0.25522800  | 1.96055700  |
| H | 7.29414300 | 1.95835200  | 3.18120800  |
| H | 3.25398600 | 0.16479300  | 4.11445000  |
| C | 6.85781700 | 1.86230900  | 2.19252000  |
| C | 5.67380900 | 1.60158200  | -0.31893100 |
| H | 2.04773000 | -0.16631700 | 1.96893400  |
| C | 6.94089500 | 2.13296900  | -0.19906500 |
| C | 7.54618900 | 2.26384900  | 1.07666700  |
| H | 5.25544900 | 1.53768000  | -1.31623500 |
| H | 8.54008900 | 2.68172900  | 1.17923700  |
| N | 4.94405300 | 0.95081600  | 3.26901200  |
| O | 7.54436000 | 2.51238900  | -1.35479600 |
| C | 8.83507900 | 3.09207200  | -1.27580700 |
| H | 9.56252600 | 2.39049800  | -0.85362900 |
| H | 9.11879400 | 3.33240200  | -2.29941700 |

|   |             |             |             |
|---|-------------|-------------|-------------|
| H | 8.82436300  | 4.00962100  | -0.67806200 |
| C | 2.92432100  | 0.30766100  | -0.53415000 |
| H | 3.39883200  | 0.85506100  | -1.35603800 |
| N | 1.50596000  | 0.61773400  | -0.51272300 |
| H | 0.94199500  | -0.11623800 | -0.95170200 |
| C | 0.96813100  | 1.84355700  | -0.35094900 |
| S | 1.87371700  | 3.20182900  | 0.07310500  |
| N | -0.37958600 | 1.83333000  | -0.56127200 |
| H | -0.77023000 | 0.94496100  | -0.89656100 |
| C | 3.01942800  | -1.21568600 | -0.76834400 |
| C | 4.45521300  | -1.71872800 | -1.02666300 |
| H | 2.64207100  | -1.68252800 | 0.15081100  |
| C | 2.70084400  | -1.41362600 | -3.15533600 |
| C | 1.88761300  | -3.10027600 | -1.65968600 |
| C | 4.34689600  | -2.89133900 | -2.01558600 |
| H | 5.08053400  | -0.93038000 | -1.46409400 |
| H | 4.92536400  | -2.02238900 | -0.08675800 |
| H | 1.93111300  | -1.58738600 | -3.91220300 |
| H | 2.97416200  | -0.35536400 | -3.21529900 |
| C | 3.93648600  | -2.32381800 | -3.38033700 |
| C | 3.23756500  | -3.86387800 | -1.54072900 |
| H | 1.31934300  | -3.45550000 | -2.52571100 |
| H | 1.25494400  | -3.25114800 | -0.78030200 |
| H | 5.30115900  | -3.42267500 | -2.08654400 |
| H | 3.69831600  | -3.14306000 | -4.06767000 |
| H | 4.76109500  | -1.75559400 | -3.82153500 |
| H | 3.23101300  | -4.71274200 | -2.23876300 |
| N | 2.10466700  | -1.65652700 | -1.83208500 |
| C | 3.57921900  | -4.41739200 | -0.17812300 |
| C | 2.84307300  | -4.41887800 | 0.93083200  |

|   |             |             |             |
|---|-------------|-------------|-------------|
| H | 4.57392100  | -4.86493200 | -0.12831000 |
| H | 3.22562200  | -4.85726600 | 1.84718300  |
| H | 1.83386500  | -4.01673800 | 0.98043800  |
| C | -1.35239500 | 2.79062300  | -0.24042100 |
| C | -2.58108300 | 2.28021300  | 0.19843600  |
| C | -1.20452000 | 4.16891100  | -0.39303500 |
| C | -3.64533600 | 3.12672700  | 0.45423800  |
| H | -2.69246300 | 1.21054000  | 0.33736000  |
| C | -2.28095900 | 5.00411400  | -0.09265900 |
| H | -0.26846600 | 4.58001000  | -0.74663100 |
| C | -3.50792600 | 4.50708200  | 0.32338600  |
| H | -4.33497200 | 5.17436200  | 0.53804800  |
| C | -2.07353400 | 6.48715700  | -0.21859400 |
| C | -4.97773000 | 2.55456100  | 0.84457400  |
| F | -5.86830500 | 2.65616300  | -0.15866000 |
| F | -5.50746900 | 3.20209900  | 1.89231500  |
| F | -4.89717400 | 1.25532100  | 1.16694500  |
| F | -1.31317600 | 6.96424200  | 0.77907200  |
| F | -1.44904900 | 6.80200700  | -1.36395100 |
| F | -3.23134300 | 7.16178600  | -0.19204700 |
| C | -6.59818300 | -3.32016700 | -0.26328000 |
| C | -5.22926700 | -3.26410700 | -0.46643200 |
| C | -4.63152100 | -2.11308800 | -1.00819500 |
| C | -5.45590100 | -1.01533900 | -1.34053500 |
| C | -6.84198000 | -1.08806400 | -1.12470600 |
| C | -7.41400900 | -2.22774800 | -0.58901700 |
| H | -4.60662900 | -4.11802700 | -0.21420400 |
| C | -3.18794900 | -2.00100400 | -1.19830600 |
| C | -4.85084700 | 0.17027500  | -1.90471100 |
| H | -7.45709100 | -0.23054500 | -1.38391100 |



|   |             |             |             |
|---|-------------|-------------|-------------|
| H | -8.48453600 | -2.27735700 | -0.42241300 |
| C | -3.51770900 | 0.28587600  | -2.09190900 |
| C | -2.58815100 | -0.76537400 | -1.68490000 |
| H | -5.50741400 | 0.99450000  | -2.17232500 |
| H | -3.07810400 | 1.18673000  | -2.50963700 |
| C | -2.35988200 | -3.02582400 | -0.84910600 |
| C | -1.53321400 | -4.01435300 | -1.10948400 |
| C | -0.88138900 | -4.78640000 | -0.05553000 |
| C | -0.05022700 | -5.88137600 | -0.28628200 |
| C | -1.25081900 | -4.43502500 | 1.25064700  |
| C | 0.39749400  | -6.63974500 | 0.79107500  |
| H | 0.23102900  | -6.14152800 | -1.30261500 |
| C | -0.83823200 | -5.22519000 | 2.32054600  |
| C | -0.00509200 | -6.32008100 | 2.08594300  |
| H | 1.05121700  | -7.48824100 | 0.61949100  |
| H | -1.17296700 | -5.00332300 | 3.32742000  |
| H | 0.32352100  | -6.92742100 | 2.92254500  |
| H | -7.04065500 | -4.21908900 | 0.15414500  |
| O | -1.35193500 | -0.57929400 | -1.74706800 |
| H | -1.41015600 | -4.30548100 | -2.15097600 |
| N | -2.13759400 | -3.30854700 | 1.32776100  |
| H | -3.03116300 | -3.59111200 | 1.73223000  |
| C | -1.67734700 | -2.05804300 | 2.01722900  |
| C | -2.87421100 | -1.10340400 | 2.01146700  |
| H | -2.59251000 | -0.15508600 | 2.47749600  |
| H | -3.22906000 | -0.90435300 | 0.99890000  |
| H | -3.70816800 | -1.52349800 | 2.58531700  |
| C | -0.49484300 | -1.46556100 | 1.25343100  |
| H | -0.73651300 | -1.29440000 | 0.20115800  |
| H | -0.22057500 | -0.50705800 | 1.70732700  |

|   |             |             |            |
|---|-------------|-------------|------------|
| H | 0.37876100  | -2.12741100 | 1.31132800 |
| C | -1.26309100 | -2.31796700 | 3.47041600 |
| H | -2.05905200 | -2.82434900 | 4.02604800 |
| H | -0.34958000 | -2.91425700 | 3.52858700 |
| H | -1.06724900 | -1.35926700 | 3.95942700 |
| C | 3.73648700  | 0.44851100  | 3.18080900 |

## M2S

0 1

|   |            |             |             |
|---|------------|-------------|-------------|
| C | 6.31465700 | -0.02943300 | 2.17817100  |
| C | 5.50115700 | -0.15989100 | 1.01371500  |
| C | 4.09702100 | -0.35038600 | 1.21514300  |
| C | 3.63069100 | -0.37285400 | 2.50502100  |
| H | 8.30724100 | 0.24919500  | 2.92217100  |
| H | 4.14363500 | -0.25358200 | 4.60643500  |
| C | 7.70963600 | 0.15692200  | 2.02127000  |
| C | 6.11643300 | -0.07910400 | -0.25728100 |
| H | 2.56926600 | -0.49262900 | 2.69939500  |
| C | 7.47789800 | 0.10558800  | -0.37671400 |
| C | 8.29004600 | 0.22123600  | 0.78052100  |
| H | 5.53977900 | -0.14721900 | -1.17251000 |
| H | 9.35992100 | 0.36641500  | 0.69538600  |
| N | 5.82254200 | -0.07054200 | 3.45080100  |
| O | 7.96838800 | 0.16870700  | -1.64153700 |
| C | 9.36371300 | 0.35176500  | -1.80682000 |
| H | 9.92931300 | -0.47243200 | -1.35891000 |
| H | 9.53929700 | 0.36717700  | -2.88149400 |
| H | 9.69645600 | 1.30029500  | -1.37176400 |
| C | 3.12576900 | -0.59042200 | 0.06987700  |
| H | 3.57076000 | -0.24064100 | -0.86630900 |

|   |             |             |             |
|---|-------------|-------------|-------------|
| N | 1.86342400  | 0.09447000  | 0.26576900  |
| H | 1.02930000  | -0.50390600 | 0.29837600  |
| C | 1.65025400  | 1.40074500  | 0.02750200  |
| S | 2.89762400  | 2.47664900  | -0.36629900 |
| N | 0.32230500  | 1.70879600  | 0.10442100  |
| H | -0.29387800 | 0.87216700  | 0.22360300  |
| C | 2.79304800  | -2.09408100 | -0.02340300 |
| C | 4.01182400  | -2.99484700 | -0.33017400 |
| H | 2.37939000  | -2.37934200 | 0.95428800  |
| C | 2.22820200  | -2.27651400 | -2.36765600 |
| C | 1.13743700  | -3.64764200 | -0.74610200 |
| C | 3.53315300  | -4.10023300 | -1.28587900 |
| H | 4.81473100  | -2.42666600 | -0.81497800 |
| H | 4.42128900  | -3.41105100 | 0.59476700  |
| H | 1.36820300  | -2.30880600 | -3.04384800 |
| H | 2.71554300  | -1.30854600 | -2.52207500 |
| C | 3.20751500  | -3.45027000 | -2.63653600 |
| C | 2.23540900  | -4.74975700 | -0.73803800 |
| H | 0.40117700  | -3.83564500 | -1.53516400 |
| H | 0.58411900  | -3.60832900 | 0.19696600  |
| H | 4.30819000  | -4.86463000 | -1.40211400 |
| H | 2.75710800  | -4.19030100 | -3.30710500 |
| H | 4.12507500  | -3.09170100 | -3.11393700 |
| H | 1.95491000  | -5.54209000 | -1.44563400 |
| N | 1.71286100  | -2.32210400 | -0.99354300 |
| C | 2.50575900  | -5.42293600 | 0.58464500  |
| C | 1.96027300  | -5.17369000 | 1.77296900  |
| H | 3.26724700  | -6.20317400 | 0.52755000  |
| H | 2.26394300  | -5.73648300 | 2.64961600  |
| H | 1.19785500  | -4.41625000 | 1.92796900  |

|   |             |             |             |
|---|-------------|-------------|-------------|
| C | -0.33130100 | 2.92146800  | -0.10616300 |
| C | -1.62121900 | 2.85447500  | -0.64717200 |
| C | 0.18888600  | 4.16985400  | 0.25475300  |
| C | -2.37050900 | 4.01198100  | -0.81923400 |
| H | -2.02245300 | 1.88749100  | -0.94434400 |
| C | -0.57510500 | 5.31293100  | 0.05299500  |
| H | 1.17537900  | 4.23933100  | 0.69313400  |
| C | -1.85854100 | 5.25853700  | -0.48039900 |
| H | -2.44154500 | 6.16024400  | -0.62443500 |
| C | 0.02608800  | 6.64789400  | 0.39108800  |
| C | -3.76754300 | 3.89248000  | -1.35401900 |
| F | -3.84300000 | 3.00561100  | -2.35868800 |
| F | -4.24257500 | 5.05851900  | -1.80312700 |
| F | -4.62859600 | 3.46097400  | -0.40508200 |
| F | -0.91531100 | 7.56503300  | 0.65914200  |
| F | 0.83396100  | 6.57425200  | 1.45862000  |
| F | 0.76380800  | 7.13010000  | -0.62187600 |
| C | -4.74850400 | -4.07004100 | -2.84575800 |
| C | -4.21514300 | -3.54206600 | -1.69002300 |
| C | -3.14182300 | -2.61179300 | -1.73118700 |
| C | -2.59666500 | -2.28833000 | -3.00372300 |
| C | -3.16112800 | -2.84410700 | -4.17261000 |
| C | -4.23008200 | -3.71006000 | -4.10569500 |
| H | -4.58017100 | -3.89951100 | -0.72872100 |
| C | -2.59578500 | -2.00523900 | -0.55505300 |
| C | -1.47133400 | -1.40663900 | -3.05542000 |
| H | -2.72940300 | -2.57593800 | -5.13374700 |
| H | -4.65636300 | -4.12995100 | -5.01026600 |
| C | -0.90419200 | -0.90884300 | -1.92278500 |
| C | -1.43339100 | -1.19888400 | -0.60444800 |

|   |             |             |             |
|---|-------------|-------------|-------------|
| H | -1.06064100 | -1.15028600 | -4.02965000 |
| H | -0.02620200 | -0.26984600 | -1.97175000 |
| C | -3.30182200 | -2.10519800 | 0.70832600  |
| C | -2.90185500 | -2.43939600 | 1.94323400  |
| C | -4.02725400 | -2.41510500 | 2.86750800  |
| C | -4.15311500 | -2.80017100 | 4.19869900  |
| C | -5.16381700 | -2.03405500 | 2.15209900  |
| C | -5.42728200 | -2.82321000 | 4.76398700  |
| H | -3.28168300 | -3.09655400 | 4.77193000  |
| C | -6.44014500 | -2.10087200 | 2.67615300  |
| C | -6.55609400 | -2.49745200 | 4.01162400  |
| H | -5.54675200 | -3.12370400 | 5.79940500  |
| H | -7.31928200 | -1.86685400 | 2.08861400  |
| H | -7.54068300 | -2.55601900 | 4.46134800  |
| H | -5.56196700 | -4.78613900 | -2.78190000 |
| O | -0.89867500 | -0.67969000 | 0.44533100  |
| H | -1.89395700 | -2.75102500 | 2.17871600  |
| N | -4.75334100 | -1.64762700 | 0.79178500  |
| H | -5.31730100 | -2.13659700 | 0.08559000  |
| C | -4.91679200 | -0.09903900 | 0.47739600  |
| C | -4.73959700 | 0.11497700  | -1.02757500 |
| H | -5.05495800 | 1.13697400  | -1.24451100 |
| H | -3.70968600 | -0.00232600 | -1.36192400 |
| H | -5.37703600 | -0.56132700 | -1.60765000 |
| C | -3.88838900 | 0.66014900  | 1.30234400  |
| H | -2.86254000 | 0.38307300  | 1.04469700  |
| H | -4.03119700 | 1.72493900  | 1.10291000  |
| H | -4.04390200 | 0.49123000  | 2.37241300  |
| C | -6.33313600 | 0.32926400  | 0.85319800  |
| H | -7.09261500 | -0.27456100 | 0.34653300  |

|   |             |             |            |
|---|-------------|-------------|------------|
| H | -6.50492700 | 0.31423500  | 1.92937900 |
| H | -6.45133100 | 1.36054500  | 0.51228900 |
| C | 4.52878300  | -0.22922800 | 3.58865300 |

**TS3R**

0 1

|   |            |             |             |
|---|------------|-------------|-------------|
| C | 2.70370200 | -1.38696400 | -2.67786800 |
| C | 3.01409800 | -1.59545300 | -1.35632700 |
| C | 3.84144400 | -2.71377500 | -1.02291700 |
| C | 4.29748400 | -3.52738900 | -2.10318100 |
| C | 3.20796800 | -2.26511100 | -3.66636400 |
| H | 3.88941300 | -2.48245500 | 1.15190100  |
| H | 2.07313600 | -0.54743300 | -2.96573800 |
| C | 4.23532400 | -3.04810500 | 0.29413600  |
| C | 5.12988300 | -4.63795400 | -1.81969300 |
| H | 2.95864200 | -2.08948400 | -4.71122900 |
| C | 5.50729300 | -4.94206900 | -0.53744400 |
| C | 5.05066500 | -4.13378000 | 0.53562400  |
| H | 5.46107400 | -5.24237100 | -2.65753200 |
| H | 6.14512100 | -5.79771400 | -0.35286000 |
| O | 5.37093600 | -4.36858300 | 1.83339400  |
| C | 6.19877600 | -5.48125000 | 2.12579700  |
| H | 7.17993200 | -5.38460900 | 1.64859800  |
| H | 6.32339900 | -5.48618100 | 3.20758900  |
| H | 5.73075600 | -6.41988400 | 1.81063000  |
| C | 2.46519900 | -0.62683100 | -0.31005700 |
| H | 2.69633600 | -0.99357400 | 0.68831200  |
| C | 3.09670900 | 0.76545300  | -0.52557700 |
| C | 4.61997900 | 0.69907900  | -0.23220800 |
| H | 2.90519900 | 1.07409700  | -1.55421300 |

|   |             |             |             |
|---|-------------|-------------|-------------|
| C | 2.48957500  | 1.36210800  | 1.76081500  |
| C | 3.31225200  | 3.04449500  | 0.20597500  |
| C | 4.89974500  | 1.38265000  | 1.10879300  |
| H | 4.95283400  | -0.34260100 | -0.19894200 |
| H | 5.18570300  | 1.19241000  | -1.02883900 |
| H | 2.20374100  | 2.20727100  | 2.38456600  |
| H | 1.72306200  | 0.59108600  | 1.88275400  |
| C | 3.90185800  | 0.86688900  | 2.15162300  |
| C | 4.66118400  | 2.89515200  | 0.93201400  |
| H | 2.75436000  | 3.89141400  | 0.60507700  |
| H | 3.44792200  | 3.20696700  | -0.86797000 |
| H | 5.92833700  | 1.19389600  | 1.42989100  |
| H | 4.15902900  | 1.24658300  | 3.14453800  |
| H | 3.94538100  | -0.22595200 | 2.20780900  |
| H | 4.57270100  | 3.33222600  | 1.93746400  |
| N | 2.46436000  | 1.82589200  | 0.33711800  |
| C | 5.81721900  | 3.58213600  | 0.25527100  |
| C | 5.78251500  | 4.36901600  | -0.81720700 |
| H | 6.77934100  | 3.40292700  | 0.73605100  |
| H | 6.69250400  | 4.81447700  | -1.20493500 |
| H | 4.86544000  | 4.61325000  | -1.34491400 |
| N | 1.02461700  | -0.53637500 | -0.42216200 |
| H | 0.75132100  | 0.14278900  | -1.16253000 |
| C | 0.15714700  | -1.34676400 | 0.19111700  |
| S | 0.58643400  | -2.38191600 | 1.46317600  |
| N | -1.10461800 | -1.27878700 | -0.34488700 |
| H | -1.17702400 | -0.77716400 | -1.22601400 |
| C | -4.92845200 | -2.09841000 | 1.21025700  |
| C | -3.86457900 | -1.87152500 | 2.06842900  |
| C | -2.57731400 | -1.63027000 | 1.59441500  |

|   |             |             |             |
|---|-------------|-------------|-------------|
| C | -2.34292600 | -1.61438700 | 0.21943300  |
| C | -3.41132000 | -1.83681400 | -0.66225300 |
| C | -4.68086400 | -2.07539600 | -0.16185500 |
| H | -5.92454000 | -2.28476300 | 1.59528200  |
| H | -1.76681300 | -1.43694600 | 2.28655500  |
| H | -3.24291600 | -1.81512600 | -1.73485900 |
| C | -5.83376700 | -2.35114700 | -1.08524700 |
| F | -6.35981600 | -3.56454300 | -0.84597800 |
| F | -6.82953700 | -1.46658100 | -0.90746300 |
| F | -5.48445100 | -2.31538300 | -2.37562000 |
| C | -4.06775700 | -1.84529200 | 3.55643600  |
| F | -5.34631600 | -2.04267700 | 3.89966300  |
| F | -3.33351600 | -2.78247500 | 4.17283300  |
| F | -3.69247900 | -0.66235500 | 4.07807000  |
| N | 3.97735900  | -3.29518900 | -3.40868900 |
| C | -1.11042400 | 2.22925600  | 3.38337700  |
| C | -0.91008500 | 2.35297100  | 2.00872000  |
| C | -0.01183000 | 3.28631500  | 1.48419400  |
| C | 0.71986800  | 4.11151400  | 2.33440800  |
| C | 0.49752000  | 4.00364900  | 3.70781700  |
| C | -0.40240300 | 3.07121600  | 4.23069300  |
| H | -1.80232600 | 1.48679100  | 3.76798800  |
| H | 1.45965700  | 4.81672000  | 1.98490100  |
| H | 1.05150100  | 4.65262000  | 4.37708100  |
| H | -0.54169600 | 3.00293100  | 5.30426200  |
| C | -1.47575200 | 1.62389100  | 0.90316600  |
| C | -0.96109300 | 2.05917600  | -0.26388200 |
| C | -1.39723200 | 1.61645400  | -1.59869000 |
| C | -2.80364500 | 1.41220000  | -1.85473700 |
| C | -0.42961800 | 1.23446900  | -2.55731400 |



|   |             |             |             |
|---|-------------|-------------|-------------|
| C | -3.84701200 | 1.81564600  | -0.97318500 |
| C | -3.20145700 | 0.77835900  | -3.07086300 |
| C | -0.88743500 | 0.64987100  | -3.79458200 |
| C | -5.16743100 | 1.53867700  | -1.24429300 |
| H | -3.60143400 | 2.36066400  | -0.06952200 |
| C | -4.56584900 | 0.50259900  | -3.32017200 |
| C | -2.20665000 | 0.41465800  | -4.02668600 |
| H | -0.12309800 | 0.36813800  | -4.51270500 |
| C | -5.54097300 | 0.85636000  | -2.41999500 |
| H | -5.93187500 | 1.85713000  | -0.54187900 |
| H | -4.82595700 | -0.00787900 | -4.24399600 |
| H | -2.52804500 | -0.06387800 | -4.94886800 |
| H | -6.58209400 | 0.62099400  | -2.61024200 |
| O | 0.83214500  | 1.31834800  | -2.31322600 |
| N | 0.08799000  | 3.09242100  | 0.02497200  |
| C | -0.09811200 | 4.39924400  | -0.82197200 |
| C | -1.58777000 | 4.75358000  | -0.79883700 |
| H | -2.18783800 | 4.05205600  | -1.38000400 |
| H | -1.96301300 | 4.78294100  | 0.23009900  |
| H | -1.71589900 | 5.74920100  | -1.23135100 |
| C | 0.66765200  | 5.59005900  | -0.23538700 |
| H | 1.74010800  | 5.40731800  | -0.14011500 |
| H | 0.55016100  | 6.41191300  | -0.94434800 |
| H | 0.25709700  | 5.92728600  | 0.71539300  |
| C | 0.41071900  | 4.19033600  | -2.24730700 |
| H | 1.41212600  | 3.75554400  | -2.25389600 |
| H | -0.24638100 | 3.55370200  | -2.83354400 |
| H | 0.44599600  | 5.17013600  | -2.73009400 |
| H | -2.22672800 | 0.85168900  | 0.99138300  |
| H | 1.16165500  | 2.45103600  | -0.04561700 |

**M3S**

0 1

|   |            |             |             |
|---|------------|-------------|-------------|
| C | 2.96279100 | 0.08386300  | 1.94249600  |
| C | 3.23207500 | 0.66613400  | 0.73117100  |
| C | 4.40882700 | 1.47483800  | 0.61458800  |
| C | 5.23280400 | 1.58892100  | 1.77301600  |
| C | 3.84552700 | 0.28146400  | 3.03318900  |
| H | 4.19513600 | 2.13621000  | -1.46204200 |
| H | 2.07442100 | -0.52528500 | 2.08840100  |
| C | 4.79729900 | 2.15866500  | -0.56111800 |
| C | 6.41734600 | 2.36169500  | 1.70046000  |
| H | 3.61532700 | -0.18633000 | 3.98763900  |
| C | 6.78436800 | 3.00632100  | 0.54766800  |
| C | 5.95656300 | 2.90637400  | -0.59953900 |
| H | 7.02742400 | 2.42590500  | 2.59526100  |
| H | 7.69594100 | 3.59021800  | 0.52451900  |
| O | 6.23567800 | 3.51915300  | -1.77643000 |
| C | 7.40323700 | 4.32027200  | -1.85357400 |
| H | 8.30659600 | 3.72624600  | -1.67862700 |
| H | 7.42540000 | 4.72060400  | -2.86594900 |
| H | 7.36579000 | 5.14721500  | -1.13669900 |
| C | 2.29826700 | 0.41640500  | -0.44558300 |
| H | 2.50286800 | 1.15844400  | -1.22053500 |
| C | 2.50790500 | -1.00398300 | -1.00544000 |
| C | 3.90882200 | -1.22286500 | -1.62488000 |
| H | 2.31620300 | -1.71738900 | -0.19476400 |
| C | 1.50238800 | -0.32014800 | -3.17437400 |
| C | 1.76176800 | -2.68534600 | -2.60685600 |
| C | 3.77445700 | -1.33944200 | -3.15008800 |

|   |             |             |             |
|---|-------------|-------------|-------------|
| H | 4.56816500  | -0.38967300 | -1.36801700 |
| H | 4.36042800  | -2.13253000 | -1.21898200 |
| H | 0.83264600  | -0.71069400 | -3.94322100 |
| H | 1.06783800  | 0.61053900  | -2.80252300 |
| C | 2.94819600  | -0.15945100 | -3.67876600 |
| C | 3.02281600  | -2.64634500 | -3.48985400 |
| H | 0.87053700  | -3.01542400 | -3.14530300 |
| H | 1.90029700  | -3.32891300 | -1.73732000 |
| H | 4.76526800  | -1.34694400 | -3.61187700 |
| H | 2.95869900  | -0.14023300 | -4.77103300 |
| H | 3.38062200  | 0.78542100  | -3.33459300 |
| H | 2.72099000  | -2.58312900 | -4.54458800 |
| N | 1.47977300  | -1.32136100 | -2.06285700 |
| C | 3.90943400  | -3.85679100 | -3.35553400 |
| C | 3.67864500  | -4.96373600 | -2.65459900 |
| H | 4.83629800  | -3.78644100 | -3.92481300 |
| H | 4.40156500  | -5.77236000 | -2.64842900 |
| H | 2.77279000  | -5.12795400 | -2.07876100 |
| N | 0.89587500  | 0.55382800  | -0.09440600 |
| H | 0.34925800  | -0.30054600 | 0.01503700  |
| C | 0.18008400  | 1.68574600  | -0.30569000 |
| S | 0.90206500  | 3.19446500  | -0.47413400 |
| N | -1.15180200 | 1.40913200  | -0.41546800 |
| H | -1.33471100 | 0.45197200  | -0.77310100 |
| C | -4.55765800 | 3.86400800  | -0.24117700 |
| C | -3.40745100 | 4.21682500  | 0.45752200  |
| C | -2.25593000 | 3.44104300  | 0.41500600  |
| C | -2.24101000 | 2.27993200  | -0.36449400 |
| C | -3.39443900 | 1.90424700  | -1.05944600 |
| C | -4.53463600 | 2.69482000  | -0.99150400 |

|   |             |             |             |
|---|-------------|-------------|-------------|
| H | -5.45129300 | 4.47413000  | -0.18780700 |
| H | -1.38238300 | 3.72469300  | 0.98801400  |
| H | -3.39573700 | 0.98888400  | -1.64561600 |
| C | -5.73805400 | 2.29756900  | -1.79842200 |
| F | -5.62109300 | 2.68737400  | -3.07842700 |
| F | -5.90739300 | 0.96714800  | -1.81393300 |
| F | -6.86343100 | 2.84597400  | -1.32133400 |
| C | -3.39291100 | 5.48884200  | 1.25795400  |
| F | -2.93268400 | 6.52242400  | 0.53545600  |
| F | -4.62076100 | 5.82362800  | 1.68070100  |
| F | -2.60578300 | 5.38807500  | 2.33821300  |
| N | 4.94331400  | 0.99265600  | 2.96524000  |
| C | 2.50023200  | -3.56961200 | 2.37099000  |
| C | 1.22068800  | -3.19214500 | 1.93187300  |
| C | 0.38993700  | -2.37515500 | 2.74160900  |
| C | 0.82684200  | -1.98582200 | 4.02202800  |
| C | 2.08490200  | -2.38852800 | 4.44011200  |
| C | 2.92833700  | -3.16187500 | 3.61965300  |
| H | 3.13263700  | -4.18085600 | 1.73323400  |
| H | 0.21475100  | -1.39844200 | 4.69246200  |
| H | 2.42480800  | -2.09532300 | 5.42855000  |
| H | 3.91249500  | -3.44463800 | 3.97843900  |
| C | 0.48347000  | -3.46599400 | 0.74388200  |
| C | -0.72503700 | -2.82558300 | 0.83884900  |
| C | -1.79491600 | -2.97929100 | -0.17344800 |
| C | -2.75531800 | -4.02413700 | -0.03403000 |
| C | -1.80951100 | -2.13879900 | -1.28056600 |
| C | -2.77224200 | -4.89247600 | 1.09321500  |
| C | -3.75751600 | -4.19365900 | -1.03122100 |
| C | -2.81590200 | -2.33514900 | -2.27807300 |

|   |             |             |             |
|---|-------------|-------------|-------------|
| C | -3.72715000 | -5.87248000 | 1.21397500  |
| H | -2.01047000 | -4.77532300 | 1.85914700  |
| C | -4.72644300 | -5.21784800 | -0.88011400 |
| C | -3.75524700 | -3.32040600 | -2.15435300 |
| H | -2.81095800 | -1.66526900 | -3.13288700 |
| C | -4.71725400 | -6.04274100 | 0.21751800  |
| H | -3.72208700 | -6.52485100 | 2.08164700  |
| H | -5.48153500 | -5.33579500 | -1.65312100 |
| H | -4.51906200 | -3.44959200 | -2.91694100 |
| H | -5.46481200 | -6.82152700 | 0.32572000  |
| O | -0.95630400 | -1.12721600 | -1.40885200 |
| N | -0.79415600 | -2.12950700 | 2.04950500  |
| C | -1.88247700 | -1.25953300 | 2.59149700  |
| C | -2.48250600 | -1.93759600 | 3.83026100  |
| H | -3.26741900 | -1.30247100 | 4.25006900  |
| H | -2.92825000 | -2.89477000 | 3.54317600  |
| H | -1.74292400 | -2.12560500 | 4.60957500  |
| C | -1.30221600 | 0.12863900  | 2.90802300  |
| H | -2.09959300 | 0.76940200  | 3.29417900  |
| H | -0.49878800 | 0.11392100  | 3.64220500  |
| H | -0.91552600 | 0.58361800  | 1.99145400  |
| C | -3.01371500 | -1.03685400 | 1.58492200  |
| H | -3.55675900 | -1.95373600 | 1.35361300  |
| H | -3.71355900 | -0.32829100 | 2.03635400  |
| H | -2.64129800 | -0.59885000 | 0.65672700  |
| H | 0.75645700  | -4.13258900 | -0.06180800 |
| H | 0.41580700  | -1.32443200 | -1.68025600 |

**TS4S**

0 1

|   |            |             |             |
|---|------------|-------------|-------------|
| C | 2.97011000 | 0.11925000  | 1.94013800  |
| C | 3.22055800 | 0.69820100  | 0.72298800  |
| C | 4.38905900 | 1.51654700  | 0.59041800  |
| C | 5.22427000 | 1.64415200  | 1.73929600  |
| C | 3.86297300 | 0.32988800  | 3.02022200  |
| H | 4.14903100 | 2.16452600  | -1.48762200 |
| H | 2.08897900 | -0.49718000 | 2.09947600  |
| C | 4.75967600 | 2.19747500  | -0.59276900 |
| C | 6.40108300 | 2.42693300  | 1.65054700  |
| H | 3.64767400 | -0.13560000 | 3.97931900  |
| C | 6.75052300 | 3.06883000  | 0.49074700  |
| C | 5.91168200 | 2.95527400  | -0.64706600 |
| H | 7.01980500 | 2.50082600  | 2.53866900  |
| H | 7.65685500 | 3.66024100  | 0.45533200  |
| O | 6.17286600 | 3.56437400  | -1.83022300 |
| C | 7.33334300 | 4.37357000  | -1.92458900 |
| H | 8.24304300 | 3.78750200  | -1.75563200 |
| H | 7.34178800 | 4.76779300  | -2.93960200 |
| H | 7.29737000 | 5.20479500  | -1.21256400 |
| C | 2.27645200 | 0.43747700  | -0.44261500 |
| H | 2.47005100 | 1.17540200  | -1.22396600 |
| C | 2.47867400 | -0.98582400 | -0.99959900 |
| C | 3.87983300 | -1.20438700 | -1.62164500 |
| H | 2.29691200 | -1.69369000 | -0.18136100 |
| C | 1.46595000 | -0.31343600 | -3.15583500 |
| C | 1.72265700 | -2.66633400 | -2.58242000 |
| C | 3.73737200 | -1.33234800 | -3.14496200 |
| H | 4.53967400 | -0.36808900 | -1.37519200 |
| H | 4.33600400 | -2.11008500 | -1.21139400 |
| H | 0.79115700 | -0.70304800 | -3.92154500 |

|   |             |             |             |
|---|-------------|-------------|-------------|
| H | 1.03751800  | 0.62395800  | -2.79180300 |
| C | 2.90815200  | -0.15553400 | -3.67575400 |
| C | 2.98207500  | -2.64021800 | -3.47074600 |
| H | 0.83158400  | -3.00061400 | -3.12007000 |
| H | 1.86175100  | -3.31108500 | -1.71348000 |
| H | 4.72560900  | -1.34403500 | -3.61285200 |
| H | 2.91125400  | -0.14340600 | -4.76844100 |
| H | 3.34490300  | 0.79106100  | -3.34091400 |
| H | 2.67726500  | -2.58437800 | -4.52537100 |
| N | 1.44258200  | -1.30530900 | -2.04140900 |
| C | 3.86596900  | -3.85201600 | -3.33106300 |
| C | 3.61935900  | -4.96434300 | -2.64408300 |
| H | 4.80305000  | -3.77997100 | -3.88358300 |
| H | 4.33837400  | -5.77641800 | -2.63130400 |
| H | 2.70176500  | -5.12805200 | -2.08695800 |
| N | 0.87736500  | 0.57760900  | -0.07600400 |
| H | 0.34100700  | -0.27887200 | 0.05663900  |
| C | 0.15547500  | 1.70225200  | -0.29533400 |
| S | 0.86630100  | 3.21175700  | -0.49544600 |
| N | -1.17938800 | 1.42223300  | -0.38414600 |
| H | -1.36784000 | 0.46766600  | -0.72886700 |
| C | -4.57640800 | 3.89129300  | -0.22997500 |
| C | -3.42560600 | 4.24296600  | 0.46848400  |
| C | -2.27799100 | 3.46126400  | 0.43240300  |
| C | -2.26768300 | 2.29610100  | -0.34079000 |
| C | -3.42094100 | 1.92199300  | -1.03607400 |
| C | -4.55787200 | 2.71811800  | -0.97384800 |
| H | -5.46729600 | 4.50584700  | -0.18135700 |
| H | -1.40386600 | 3.74379000  | 1.00511000  |
| H | -3.42551400 | 1.00496600  | -1.61946800 |

|   |             |             |             |
|---|-------------|-------------|-------------|
| C | -5.76206700 | 2.32263700  | -1.78058800 |
| F | -5.64331800 | 2.70896300  | -3.06133300 |
| F | -5.93539000 | 0.99261000  | -1.79278900 |
| F | -6.88586400 | 2.87555800  | -1.30518500 |
| C | -3.40672100 | 5.51981000  | 1.26113600  |
| F | -2.94600400 | 6.54780400  | 0.53117800  |
| F | -4.63314100 | 5.85951500  | 1.68411700  |
| F | -2.61768000 | 5.42388500  | 2.34035300  |
| N | 4.95315600  | 1.05109900  | 2.93749600  |
| C | 2.53833100  | -3.52331900 | 2.44812700  |
| C | 1.25845800  | -3.17506400 | 1.98706600  |
| C | 0.40412800  | -2.35626700 | 2.76947000  |
| C | 0.81876300  | -1.93609000 | 4.04811900  |
| C | 2.07793400  | -2.30991500 | 4.48842300  |
| C | 2.94421400  | -3.08485100 | 3.69352500  |
| H | 3.18793700  | -4.13557700 | 1.82912600  |
| H | 0.18934900  | -1.34699100 | 4.70073900  |
| H | 2.40105700  | -1.99227900 | 5.47491900  |
| H | 3.92860600  | -3.34341000 | 4.06962000  |
| C | 0.54297600  | -3.48442300 | 0.79501800  |
| C | -0.67562900 | -2.86064900 | 0.86008400  |
| C | -1.72442700 | -3.04590800 | -0.17029000 |
| C | -2.64936400 | -4.12665500 | -0.05260200 |
| C | -1.75879300 | -2.20574600 | -1.27307000 |
| C | -2.65156900 | -5.00183500 | 1.06889700  |
| C | -3.62983300 | -4.32336300 | -1.06584300 |
| C | -2.73828300 | -2.42522500 | -2.28728700 |
| C | -3.57357900 | -6.01493700 | 1.16948200  |
| H | -1.90478800 | -4.86370400 | 1.84580400  |
| C | -4.56526100 | -5.38136200 | -0.93524700 |



|   |             |             |             |
|---|-------------|-------------|-------------|
| C | -3.64385400 | -3.44434900 | -2.18371600 |
| H | -2.74429900 | -1.74760400 | -3.13560200 |
| C | -4.54273100 | -6.21199200 | 0.15737400  |
| H | -3.55884800 | -6.67264400 | 2.03287500  |
| H | -5.30507800 | -5.51964900 | -1.71933400 |
| H | -4.39214200 | -3.59497200 | -2.95737700 |
| H | -5.26455800 | -7.01663900 | 0.24991100  |
| O | -0.94360900 | -1.14857600 | -1.38097500 |
| N | -0.77441800 | -2.14327800 | 2.05646100  |
| C | -1.89787300 | -1.30841800 | 2.58129100  |
| C | -2.48895900 | -2.00251900 | 3.81550800  |
| H | -3.29870800 | -1.39268600 | 4.22544800  |
| H | -2.90001300 | -2.97460100 | 3.52663900  |
| H | -1.75137000 | -2.16441200 | 4.60263300  |
| C | -1.37107700 | 0.10027900  | 2.90035200  |
| H | -2.19652900 | 0.71322500  | 3.27267600  |
| H | -0.57851400 | 0.11737200  | 3.64584500  |
| H | -0.98819400 | 0.56684400  | 1.98818200  |
| C | -3.02346200 | -1.12841800 | 1.56008600  |
| H | -3.52988200 | -2.06469100 | 1.32276200  |
| H | -3.75430700 | -0.44577900 | 2.00178900  |
| H | -2.65625200 | -0.67684100 | 0.63606200  |
| H | 0.84328200  | -4.15720600 | 0.00434800  |
| H | 0.28760000  | -1.30899000 | -1.64376800 |

**M4S**

0 1

|   |            |             |             |
|---|------------|-------------|-------------|
| C | 3.51255300 | 0.48018100  | -2.44285900 |
| C | 3.81856300 | -0.21795700 | -1.30209600 |
| C | 4.92667000 | -1.12164700 | -1.34388100 |

|   |            |             |             |
|---|------------|-------------|-------------|
| C | 5.64882300 | -1.20796600 | -2.57178300 |
| C | 4.29166100 | 0.30991500  | -3.61147900 |
| H | 4.80216000 | -1.92214700 | 0.68762300  |
| H | 2.66979900 | 1.16579400  | -2.46642600 |
| C | 5.33935000 | -1.92301900 | -0.25385000 |
| C | 6.76085900 | -2.08202100 | -2.65158400 |
| H | 4.03808100 | 0.87199200  | -4.50784800 |
| C | 7.15164800 | -2.84397600 | -1.58124600 |
| C | 6.42557600 | -2.76532700 | -0.36438100 |
| H | 7.29526200 | -2.12920000 | -3.59452500 |
| H | 8.00547400 | -3.50380400 | -1.67407900 |
| O | 6.73708000 | -3.49109700 | 0.73770900  |
| C | 7.82865800 | -4.39229100 | 0.65932400  |
| H | 8.76604800 | -3.86545200 | 0.45119100  |
| H | 7.89364700 | -4.86980400 | 1.63585000  |
| H | 7.66084600 | -5.15584700 | -0.10738600 |
| C | 2.98767300 | 0.00894200  | -0.04548700 |
| H | 3.23308600 | -0.75544000 | 0.69167100  |
| C | 3.29480200 | 1.40164500  | 0.54807200  |
| C | 4.73454500 | 1.44950900  | 1.12972000  |
| H | 3.18542800 | 2.14532900  | -0.25275100 |
| C | 2.27045200 | 0.76489200  | 2.67274100  |
| C | 2.76386200 | 3.06805100  | 2.19226600  |
| C | 4.64351700 | 1.53004400  | 2.66283800  |
| H | 5.29862000 | 0.55732600  | 0.84035200  |
| H | 5.28084000 | 2.30788900  | 0.72860800  |
| H | 1.66441800 | 1.18687500  | 3.47952500  |
| H | 1.74648700 | -0.12179800 | 2.30541900  |
| C | 3.69952900 | 0.42744800  | 3.16195100  |
| C | 4.02496500 | 2.88291900  | 3.07687400  |

|   |             |             |             |
|---|-------------|-------------|-------------|
| H | 1.93508400  | 3.49894100  | 2.76208400  |
| H | 2.99534900  | 3.75523500  | 1.37086100  |
| H | 5.63696500  | 1.41902400  | 3.10543500  |
| H | 3.72221900  | 0.37138900  | 4.25382800  |
| H | 4.02580900  | -0.54840900 | 2.78455200  |
| H | 3.72387000  | 2.81060200  | 4.12944800  |
| N | 2.31315300  | 1.78754100  | 1.59711500  |
| C | 4.96547700  | 4.04457300  | 2.94169300  |
| C | 5.32557700  | 4.84017800  | 3.94476000  |
| H | 5.36290400  | 4.23273100  | 1.94305400  |
| H | 6.01230500  | 5.66704900  | 3.79710800  |
| H | 4.94314100  | 4.68770500  | 4.95089800  |
| N | 1.56568600  | -0.13355100 | -0.30670500 |
| H | 1.03896300  | 0.70487000  | -0.52088100 |
| C | 0.84974600  | -1.23765600 | -0.00586300 |
| S | 1.57148300  | -2.71362900 | 0.39558300  |
| N | -0.49419200 | -1.03088100 | -0.02942600 |
| H | -0.82572300 | -0.06552000 | -0.02215100 |
| C | -3.47194400 | -3.94977700 | 0.52439700  |
| C | -2.53174700 | -4.08588600 | -0.49016100 |
| C | -1.53279200 | -3.13869500 | -0.67807300 |
| C | -1.47419500 | -2.03101400 | 0.16423900  |
| C | -2.42168000 | -1.86766000 | 1.17287700  |
| C | -3.40849800 | -2.83149300 | 1.34697700  |
| H | -4.25536500 | -4.68806700 | 0.65498100  |
| H | -0.81089700 | -3.24540600 | -1.47967200 |
| H | -2.38747800 | -0.99087700 | 1.81252300  |
| C | -4.37420200 | -2.71905200 | 2.49076900  |
| F | -5.59091600 | -3.18224700 | 2.16926300  |
| F | -3.95775600 | -3.43885800 | 3.54747400  |

|   |             |             |             |
|---|-------------|-------------|-------------|
| F | -4.51677900 | -1.45548100 | 2.91680200  |
| C | -2.58988100 | -5.28314200 | -1.39379400 |
| F | -1.84893900 | -6.30066100 | -0.92777400 |
| F | -3.84461800 | -5.74119400 | -1.52377300 |
| F | -2.13385600 | -4.99945500 | -2.62275600 |
| N | 5.32594600  | -0.49190600 | -3.68680300 |
| C | -4.21106200 | -1.19392400 | -1.82756400 |
| C | -3.71230700 | 0.00953000  | -1.30088500 |
| C | -4.33850500 | 0.62241100  | -0.18728700 |
| C | -5.47244200 | 0.02703700  | 0.39624900  |
| C | -5.95225300 | -1.15142800 | -0.14878800 |
| C | -5.32921200 | -1.76483700 | -1.25278300 |
| H | -3.71280800 | -1.66562100 | -2.66982800 |
| H | -5.97938500 | 0.45423200  | 1.25099600  |
| H | -6.82298900 | -1.61779600 | 0.29990300  |
| H | -5.72238800 | -2.69984900 | -1.64002400 |
| C | -2.60827000 | 0.83876200  | -1.65398500 |
| C | -2.59074900 | 1.90035600  | -0.78605600 |
| C | -1.63277200 | 3.02389100  | -0.92666500 |
| C | -1.92202000 | 4.09809900  | -1.82142200 |
| C | -0.41964100 | 2.98868100  | -0.26886000 |
| C | -3.16492300 | 4.19383700  | -2.50714700 |
| C | -0.95696200 | 5.12513500  | -2.02264900 |
| C | 0.54424500  | 4.00840600  | -0.47978400 |
| C | -3.42194500 | 5.24798100  | -3.34807400 |
| H | -3.90817400 | 3.41593800  | -2.35980000 |
| C | -1.25067200 | 6.19890800  | -2.90311800 |
| C | 0.28005900  | 5.04526400  | -1.33283700 |
| H | 1.48761300  | 3.96008500  | 0.05127600  |
| C | -2.45610500 | 6.26287300  | -3.55358900 |

|   |             |            |             |
|---|-------------|------------|-------------|
| H | -4.37555700 | 5.30550800 | -3.86331000 |
| H | -0.49983700 | 6.97075800 | -3.04891600 |
| H | 1.02087500  | 5.82452800 | -1.48730100 |
| H | -2.67468100 | 7.08750500 | -4.22379900 |
| O | -0.18147000 | 1.97429600 | 0.60192100  |
| N | -3.63956900 | 1.78616800 | 0.12622200  |
| C | -3.99901700 | 2.66030100 | 1.27986700  |
| C | -5.40801000 | 3.22544300 | 1.05019900  |
| H | -5.69480400 | 3.84625100 | 1.90327900  |
| H | -5.40625700 | 3.85097200 | 0.15247800  |
| H | -6.16510400 | 2.45256300 | 0.92220500  |
| C | -3.89212200 | 1.83657300 | 2.57156900  |
| H | -4.18063200 | 2.45694100 | 3.42458300  |
| H | -4.51651600 | 0.94489100 | 2.57040400  |
| H | -2.85236600 | 1.52320700 | 2.71136300  |
| C | -3.05293400 | 3.85176500 | 1.44014800  |
| H | -3.06679100 | 4.51501900 | 0.57358400  |
| H | -3.40107900 | 4.42106200 | 2.30648600  |
| H | -2.02924900 | 3.52872500 | 1.63795500  |
| H | -1.91555700 | 0.70269300 | -2.47302000 |
| H | 0.75665200  | 2.00466900 | 1.00289500  |

**PS**

0 1

|   |            |             |             |
|---|------------|-------------|-------------|
| C | 3.33494000 | -1.79523800 | -1.65097900 |
| C | 2.26670300 | -1.04571200 | -1.13190500 |
| C | 2.45759500 | -0.20384900 | -0.00650500 |
| C | 3.72612500 | -0.11975900 | 0.59818900  |
| C | 4.76207400 | -0.86975200 | 0.06724000  |
| C | 4.57566700 | -1.70440300 | -1.05045600 |

|   |             |             |             |
|---|-------------|-------------|-------------|
| H | 3.17647600  | -2.43725400 | -2.51262600 |
| H | 3.92051600  | 0.50352700  | 1.46061800  |
| H | 5.74170900  | -0.80822800 | 0.53045800  |
| H | 5.41236500  | -2.27716100 | -1.43727100 |
| C | 0.89687800  | -0.92556100 | -1.50225900 |
| C | 0.30631800  | -0.04850000 | -0.63315700 |
| C | -1.14086400 | 0.27272600  | -0.69056600 |
| C | -2.09245500 | -0.58449200 | -0.06029000 |
| C | -1.58620600 | 1.34532500  | -1.43345800 |
| C | -1.69279300 | -1.68901600 | 0.74219500  |
| C | -3.48393400 | -0.31906800 | -0.20343400 |
| C | -2.97093300 | 1.60800600  | -1.58369000 |
| C | -2.62807400 | -2.48391800 | 1.35643400  |
| H | -0.63301200 | -1.89619000 | 0.85728500  |
| C | -4.42635800 | -1.16566400 | 0.43687200  |
| C | -3.89269400 | 0.79307800  | -0.98489900 |
| H | -3.28763900 | 2.46208500  | -2.17604100 |
| C | -4.01157600 | -2.22543100 | 1.20181200  |
| H | -2.30617400 | -3.32231600 | 1.96598100  |
| H | -5.48459700 | -0.95328600 | 0.31038800  |
| H | -4.95396000 | 0.99441100  | -1.09943400 |
| H | -4.73800900 | -2.86674400 | 1.68978700  |
| O | -0.65438600 | 2.17213300  | -1.97760900 |
| N | 1.24465300  | 0.40914500  | 0.29404200  |
| C | 1.08632700  | 1.38257300  | 1.41172300  |
| C | 2.01774700  | 2.57811000  | 1.15963000  |
| H | 1.73371000  | 3.06277800  | 0.22101500  |
| H | 1.90770100  | 3.30225700  | 1.97155700  |
| H | 3.06904400  | 2.30094100  | 1.09355500  |
| C | -0.33238500 | 1.94641900  | 1.51537100  |

|   |             |             |             |
|---|-------------|-------------|-------------|
| H | -1.07587000 | 1.16973800  | 1.70287300  |
| H | -0.34058000 | 2.63390400  | 2.36559200  |
| H | -0.60872000 | 2.50984800  | 0.62266500  |
| C | 1.38703800  | 0.66612100  | 2.73616400  |
| H | 2.38222300  | 0.22349800  | 2.76798500  |
| H | 1.30302800  | 1.37671600  | 3.56301900  |
| H | 0.65493400  | -0.13231000 | 2.89073700  |
| H | 0.38463100  | -1.43060800 | -2.30880300 |
| H | -1.09011300 | 2.87135200  | -2.48094700 |
